# Supplementary material for: A DFT study of the mechanism of NHC catalysed annulation reactions involving α,β-unsaturated acyl azoliums and β-naphthol
Source: Royal Society of Chemistry journal article supplement (doi:10.1039/c6ob01442a), 2016-01-01
Supplement: c6ob01442a1.pdf [file c6ob01442a1.pdf]

### Supporting Information:

## A DFT study of the mechanism of NHC catalysed annulation reactions involving $\alpha,\beta$ -unsaturated acyl azoliums and $\beta$ -naphthol.

M. José Aurell, Luis R. Domingo,\* Manuel Arnó and Ramón J. Zaragoza\*

Departamento de Química Orgánica, Universidad de Valencia,  
Dr. Moliner 50, E-46100 Burjassot, Valencia, Spain.

E-mail: [domingo@utopia.uv.es](mailto:domingo@utopia.uv.es); [ramon.j.zaragoza@uv.es](mailto:ramon.j.zaragoza@uv.es)

### Contents:

|                                                                                                                                                                                                                                                                                                                             |     |
|-----------------------------------------------------------------------------------------------------------------------------------------------------------------------------------------------------------------------------------------------------------------------------------------------------------------------------|-----|
| <b>Figure S1.</b> Energy profile (IRC, $\Delta E$ ) corresponding to the transition state <b>TS1</b> in toluene                                                                                                                                                                                                             | S3  |
| <b>Figure S2.</b> Geometries, in toluene, of the TS involved in the reaction of ion pair <b>6</b> with naphthol <b>7</b> via 1, 2-addition/Claisen rearrangement                                                                                                                                                            | S4  |
| <b>Figure S3.</b> Geometries, in toluene, of the TS involved in the reaction of ion pair <b>6</b> with naphthol <b>7</b> via 1, 4-addition                                                                                                                                                                                  | S4  |
| <b>Figure S4.</b> Geometries, in toluene, of the TS involved in the reaction of ion pair <b>6</b> with naphthothiol <b>9</b> via 1, 2-addition/Claisen rearrangement ( <b>TS7</b> and <b>TS8</b> ) and via 1, 4-addition ( <b>TS9</b> )                                                                                     | S5  |
| <b>Figure S5.</b> Energy profile (IRC, $\Delta E$ ) corresponding to the transition state <b>TS7</b> in toluene                                                                                                                                                                                                             | S6  |
| <b>Figure S6.</b> Geometries, in toluene, of <b>TS10a-c</b> involved in the 1, 4-addition reaction of methoxy substituted $\beta$ -naphthalenethiols <b>26a-c</b> to IP <b>6</b>                                                                                                                                            | S7  |
| <b>Table S1.</b> Absolute energies (E, H, G in hartree and S in Cal/Mol-Kelvin), in toluene, of the stationary points involved Formation of acyl azolium <b>5a</b>                                                                                                                                                          | S8  |
| <b>Table S2.</b> Absolute energies (E, H, G in hartree and S in Cal/Mol-Kelvin) and relative energies ( $\Delta E$ , $\Delta H$ and $\Delta G$ in Kcal/Mol), in toluene, of the stationary points involved in the NHC catalysed reaction of ion pair <b>6</b> with naphthol <b>7</b> via 1,2-addition/Claisen rearrangement | S8  |
| <b>Table S3.</b> Absolute energies (E, H, G in hartree and S in Cal/Mol-Kelvin) and relative energies ( $\Delta E$ , $\Delta H$ and $\Delta G$ in Kcal/Mol), in toluene, of the stationary points involved in the NHC catalysed reaction of ion pair <b>6</b> with naphthol <b>7</b> via 1,4-addition                       | S9  |
| <b>Table S4.</b> Absolute energies (E, H, G in hartree and S in Cal/Mol-Kelvin) and relative energies ( $\Delta E$ , $\Delta H$ and $\Delta G$ in Kcal/Mol), in toluene, of the stationary points involved in the NHC catalysed reaction of ion pair <b>6</b> with naphthothiol <b>9</b> via 1,2-addition/Claisen           | S10 |

|                                                                                                                                                                                                                                                                                                        |         |
|--------------------------------------------------------------------------------------------------------------------------------------------------------------------------------------------------------------------------------------------------------------------------------------------------------|---------|
| rearrangement and <i>via</i> 1,4-addition                                                                                                                                                                                                                                                              |         |
| <b>Table S5.</b> Absolute energies (E, H, G in hartree and S in Cal/Mol-Kelvin) and relative energies ( $\Delta E$ , $\Delta H$ and $\Delta G$ in Kcal/Mol), in toluene, of <b>TSa-c</b> involved in the 1,4-additions of methoxy substituted $\beta$ -naphthalenethiols <b>26a-c</b> to IP <b>6</b> . | S11     |
| Z-matrix of compounds <b>3, 6, 7, 9, 10, 14-25</b>                                                                                                                                                                                                                                                     | S11-S26 |
| Z-matrix of <b>TS1-TS9</b>                                                                                                                                                                                                                                                                             | S27-S35 |
| Z-matrix of <b>TS10a-c</b>                                                                                                                                                                                                                                                                             | S36-S39 |

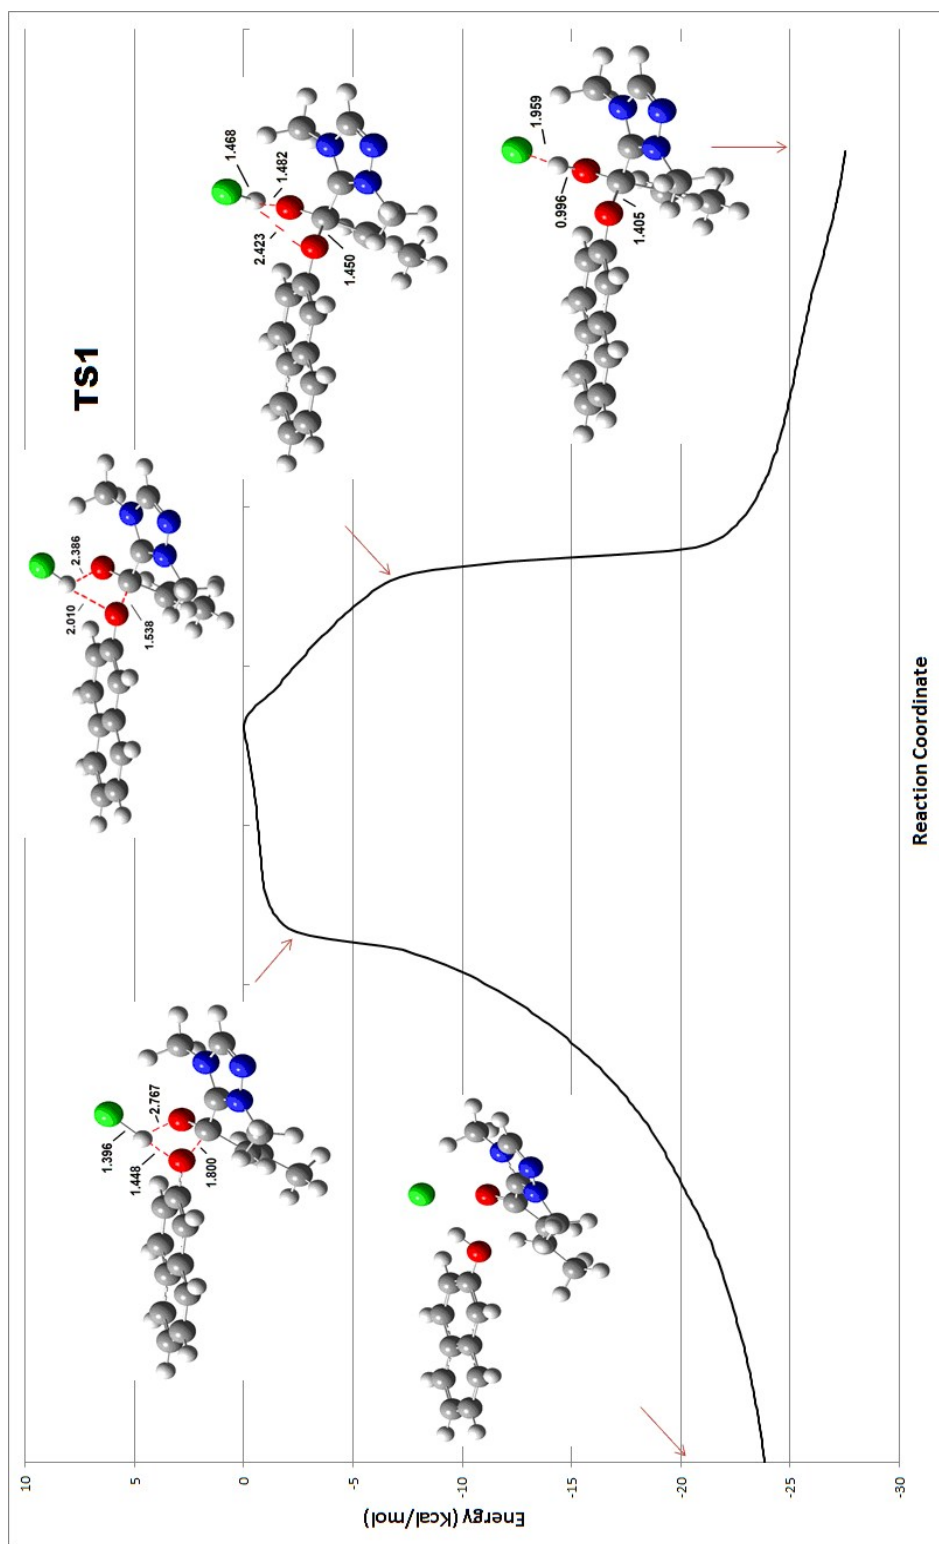

**Figure S1.** Energy profile (IRC,  $\Delta E$ ) corresponding to the transition state **TS1** in toluene

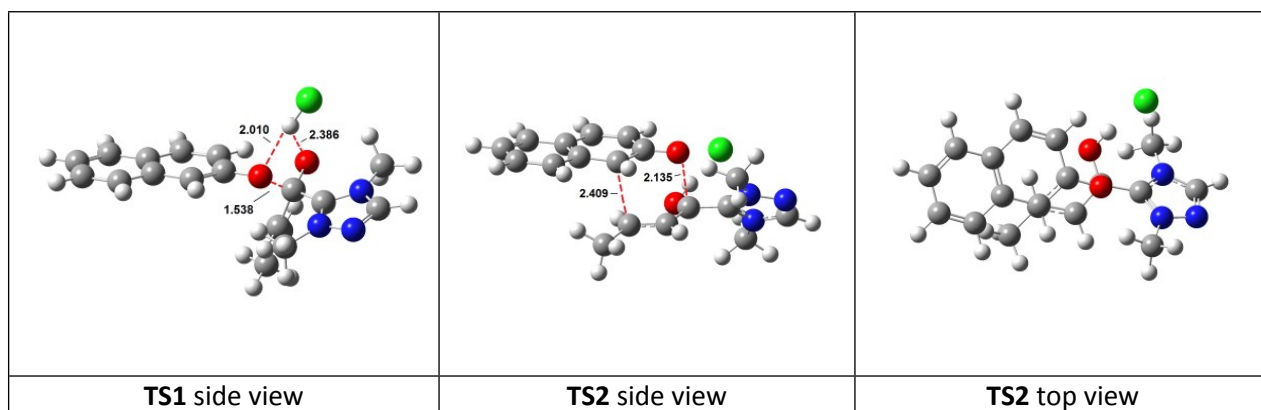

**Figure S2.** Geometries, in toluene, of the TS involved in the reaction of ion pair **6** with naphthol **7** via 1, 2-addition/Claisen rearrangement . The bond lengths (in black) are given in angstroms.

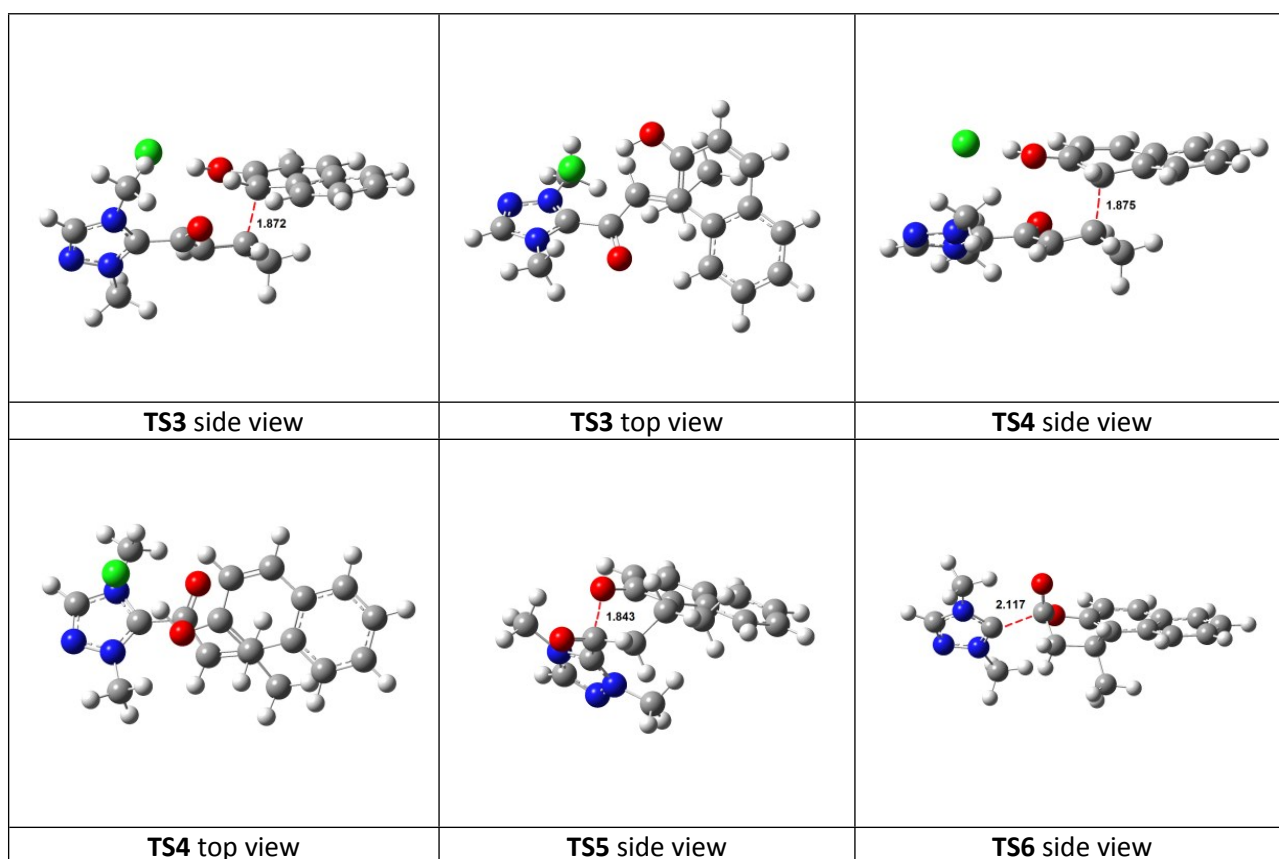

**Figure S3.** Geometries, in toluene, of the TS involved in the reaction of ion pair **6** with naphthol **7** via 1, 4-addition. The bond lengths (in black) are given in angstroms.

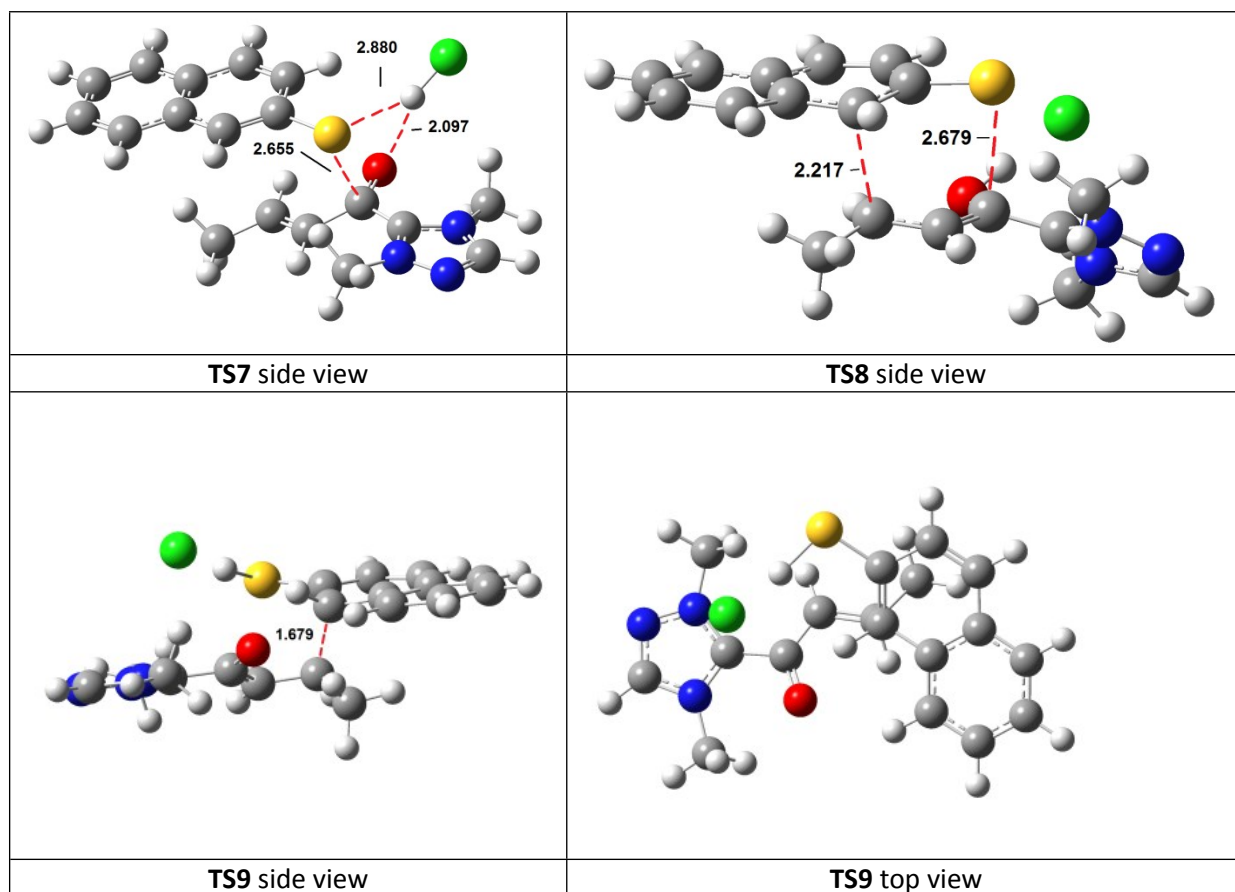

**Figure S4.** Geometries, in toluene, of the TS involved in the reaction of ion pair **6** with naphthothiol **9** via 1, 2-addition/Claisen rearrangement (**TS7** and **TS8**) and via 1, 4-addition (**TS9**). The bond lengths (in black) are given in angstroms.

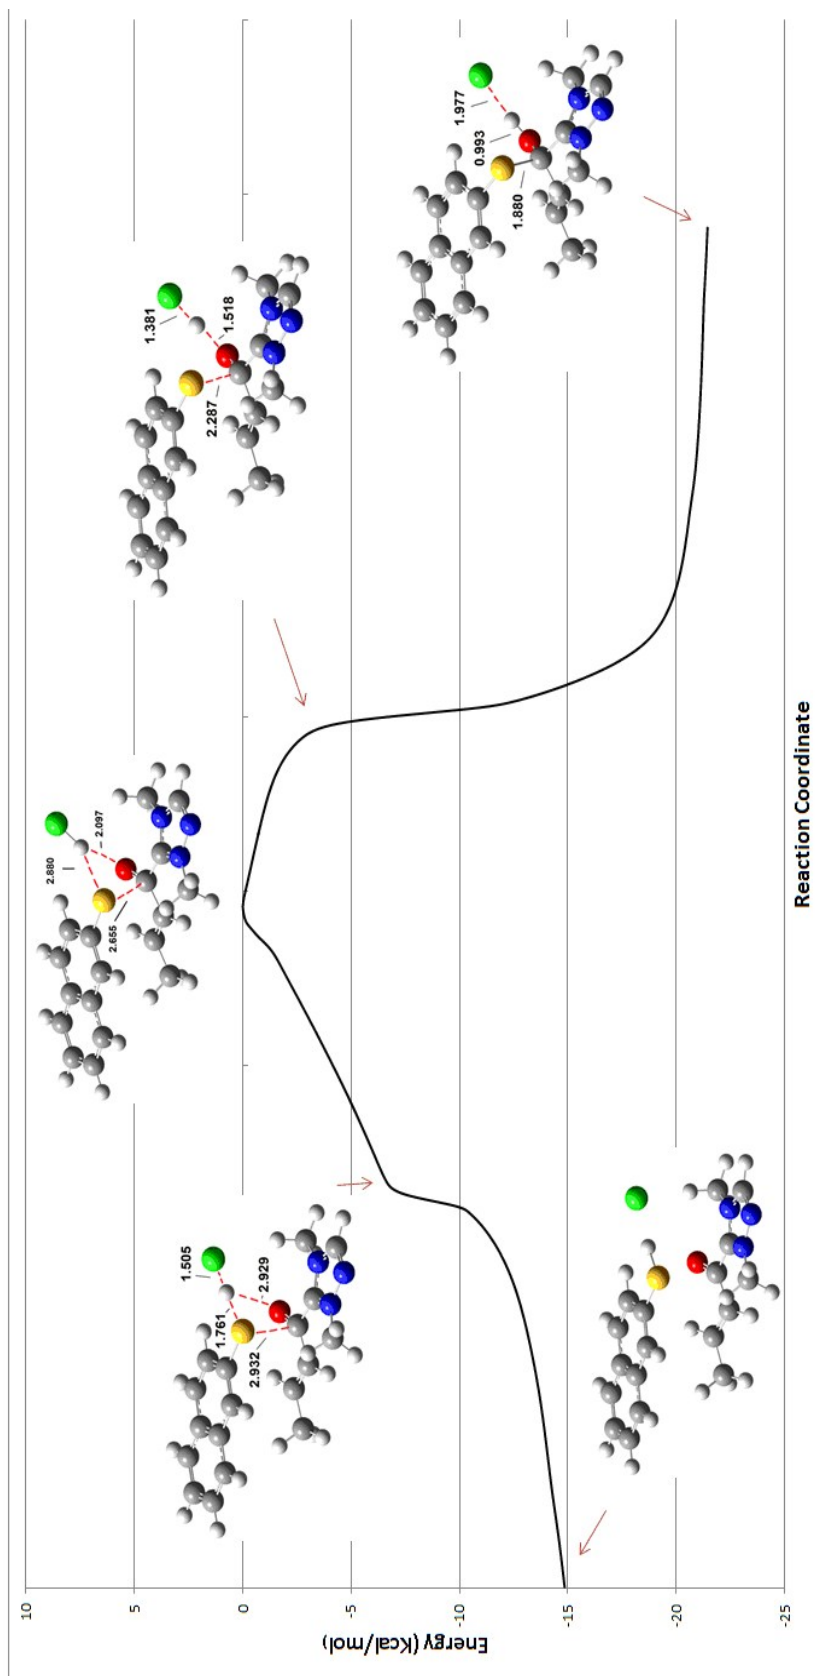

**Figure S5.** Energy profile (IRC,  $\Delta E$ ) corresponding to the transition state TS7 in toluene

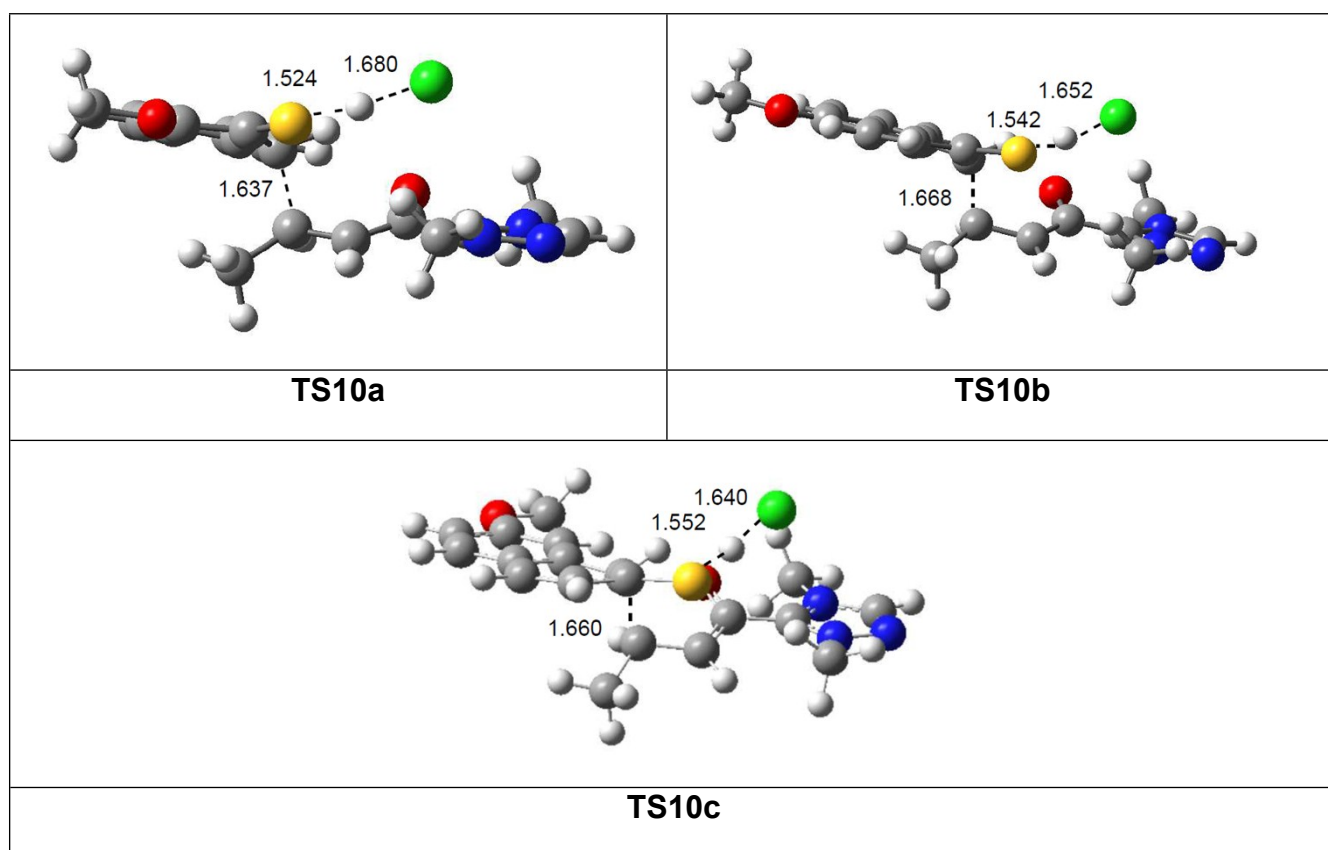

**Figure S6.** Geometries, in toluene, of **TS10a-c** involved in the 1, 4-addition reaction of methoxy substituted  $\beta$ -naphthalenethiols **26a-c** to IP **6**

**Table S1.** Absolute energies (E, H, G in hartree and S in Cal/Mol-Kelvin), in toluene, of the stationary points involved Formation of acyl azolium **5a**.

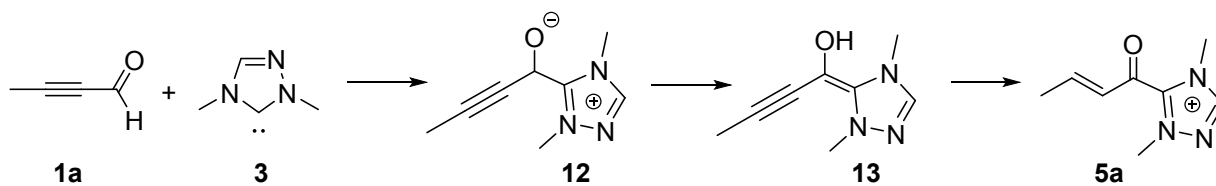

|           | E            | H           | S       | G           |
|-----------|--------------|-------------|---------|-------------|
| <b>1a</b> | -229.9142511 | -229.839381 | 77.718  | -229.878165 |
| <b>3</b>  | -320.748475  | -320.621656 | 82.781  | -320.662966 |
| <b>12</b> | -550.6702906 | -550.465351 | 115.581 | -550.52303  |
| <b>13</b> | -550.692246  | -550.486502 | 118.537 | -550.545657 |
| <b>5a</b> | -551.1855937 | -550.966342 | 115.982 | -551.024221 |

**Table S2.** Absolute energies (E, H, G in hartree and S in Cal/Mol-Kelvin) and relative energies ( $\Delta E$ ,  $\Delta H$  and  $\Delta G$  in Kcal/Mol), in toluene, of the stationary points involved in the NHC catalysed reaction of ion pair **6** with naphthol **7** via 1,2-addition/Claisen rearrangement.

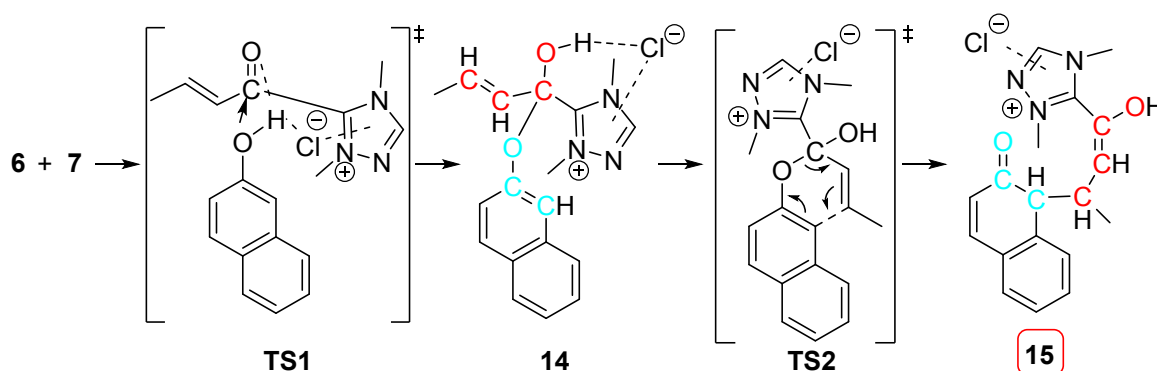

|            | E            | $\Delta E$ | H            | $\Delta H$ | S       | G            | $\Delta G$ |
|------------|--------------|------------|--------------|------------|---------|--------------|------------|
| <b>6</b>   | -1011.656065 |            | -1011.433353 |            | 121.315 | -1011.493893 |            |
| <b>7</b>   | -460.995574  |            | -460.830708  |            | 88.572  | -460.874909  |            |
| <b>6+7</b> | -1472.651639 | 0.0        | -1472.264061 | 0.0        | 209.887 | -1472.368802 | 0.0        |
| <b>TS1</b> | -1472.623304 | 17.8       | -1472.238769 | 15.9       | 170.760 | -1472.323984 | 28.1       |
| <b>14</b>  | -1472.670223 | -11.7      | -1472.281250 | -10.8      | 163.053 | -1472.362619 | 3.9        |
| <b>TS2</b> | -1472.625461 | 16.4       | -1472.238023 | 16.3       | 158.056 | -1472.327622 | 25.8       |
| <b>15</b>  | -1472.676465 | -15.6      | -1472.285119 | -13.2      | 163.310 | -1472.366617 | 1.4        |



**Table S3.** Absolute energies (E, H, G in hartree and S in Cal/Mol-Kelvin) and relative energies ( $\Delta E$ ,  $\Delta H$  and  $\Delta G$  in Kcal/Mol), in toluene, of the stationary points involved in the NHC catalysed reaction of ion pair **6** with naphthol **7** via 1,4-addition.

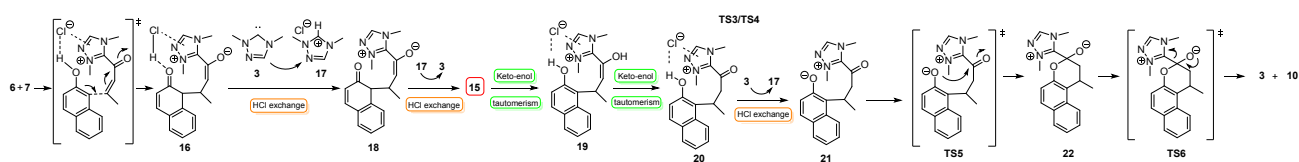

|              | E            | $\Delta E$         | H            | $\Delta H$         | S       | G            | $\Delta G$         |
|--------------|--------------|--------------------|--------------|--------------------|---------|--------------|--------------------|
| <b>6</b>     | -1011.656065 |                    | -1011.433353 |                    | 121.315 | -1011.493893 |                    |
| <b>7</b>     | -460.995574  |                    | -460.830708  |                    | 88.572  | -460.874909  |                    |
| <b>3</b>     | -320.748475  |                    | -320.621656  |                    | 82.781  | -320.662966  |                    |
| <b>17</b>    | -781.674861  |                    | -781.531677  |                    | 97.950  | -781.580558  |                    |
| <b>6+7</b>   | -1472.651639 | 0.0                | -1472.264061 | 0.0                | 209.887 | -1472.368802 | 0.0                |
| <b>6+7+3</b> | -1793.400113 |                    | -1792.885717 |                    | 292.668 | -1793.031768 |                    |
| <b>TS3</b>   | -1472.644413 | 4.5 <sup>a</sup>   | -1472.255862 | 5.1 <sup>a</sup>   | 157.499 | -1472.334460 | 21.5 <sup>a</sup>  |
| <b>TS4</b>   | -1472.640764 | 6.8 <sup>a</sup>   | -1472.252864 | 7.0 <sup>a</sup>   | 157.823 | -1472.331624 | 23.3 <sup>a</sup>  |
| <b>16</b>    | -1472.645736 | 3.7 <sup>a</sup>   | -1472.256485 | 4.8 <sup>a</sup>   | 158.323 | -1472.335494 | 20.9 <sup>a</sup>  |
| <b>16+3</b>  | -1793.394211 | 3.7 <sup>b</sup>   | -1792.878141 | 4.8 <sup>b</sup>   | 241.104 | -1792.998460 | 20.9 <sup>b</sup>  |
| <b>18+17</b> | -1793.421853 | -13.6 <sup>b</sup> | -1792.904096 | -11.5 <sup>b</sup> | 251.942 | -1793.029825 | 1.2 <sup>b</sup>   |
| <b>18</b>    | -1011.746992 | -13.6 <sup>c</sup> | -1011.372419 | -11.5 <sup>c</sup> | 153.992 | -1011.449267 | 1.2 <sup>c</sup>   |
| <b>15+3</b>  | -1793.424939 | -15.6 <sup>b</sup> | -1792.906775 | -13.2 <sup>b</sup> | 246.091 | -1793.029583 | 1.4 <sup>b</sup>   |
| <b>15</b>    | -1472.676465 | -15.6 <sup>a</sup> | -1472.285119 | -13.2 <sup>a</sup> | 163.310 | -1472.366617 | 1.4 <sup>a</sup>   |
| <b>19</b>    | -1472.679388 | -17.4 <sup>a</sup> | -1472.289076 | -15.7 <sup>a</sup> | 162.181 | -1472.370010 | -0.8 <sup>a</sup>  |
| <b>20</b>    | -1472.691489 | -25.0 <sup>a</sup> | -1472.299739 | -22.4 <sup>a</sup> | 156.460 | -1472.377818 | -5.7 <sup>a</sup>  |
| <b>20+3</b>  | -1793.439964 | -25.0 <sup>b</sup> | -1792.921395 | -22.4 <sup>b</sup> | 239.241 | -1793.040784 | -5.7 <sup>b</sup>  |
| <b>21+17</b> | -1793.432800 | -20.5 <sup>b</sup> | -1792.914273 | -17.9 <sup>b</sup> | 243.494 | -1793.035786 | -2.5 <sup>b</sup>  |
| <b>21</b>    | -1011.757940 | -20.5 <sup>d</sup> | -1011.382596 | -17.9 <sup>d</sup> | 145.544 | -1011.455228 | -2.5 <sup>d</sup>  |
| <b>TS5</b>   | -1011.754778 | -18.5 <sup>d</sup> | -1011.380921 | -16.9 <sup>d</sup> | 142.281 | -1011.451924 | -0.4 <sup>d</sup>  |
| <b>22</b>    | -1011.768419 | -27.1 <sup>d</sup> | -1011.393115 | -24.5 <sup>d</sup> | 144.124 | -1011.465038 | -8.7 <sup>d</sup>  |
| <b>TS6</b>   | -1011.752008 | -16.8 <sup>d</sup> | -1011.378539 | -15.4 <sup>d</sup> | 148.798 | -1011.452794 | -1.0 <sup>d</sup>  |
| <b>10+3</b>  | -1011.763826 | -24.2 <sup>d</sup> | -1011.391262 | -23.4 <sup>d</sup> | 193.161 | -1011.487656 | -22.9 <sup>d</sup> |
| <b>10</b>    | -691.015351  | -24.2 <sup>e</sup> | -690.769606  | -23.4 <sup>e</sup> | 110.380 | -690.824690  | -22.9 <sup>e</sup> |

(a) Relative to **6 + 7**

(b) Relative to **6 + 7 + 3**

(c) From **(18 + 17) - (6 + 7 + 3)**

(d) Relative to **18**

(e) Relative to **18 - 3**

**Table S4.** Absolute energies (E, H, G in hartree and S in Cal/Mol-Kelvin) and relative energies ( $\Delta E$ ,  $\Delta H$  and  $\Delta G$  in Kcal/Mol), in toluene, of the stationary points involved in the NHC catalysed reaction of ion pair **6** with naphthothiol **9** via 1,2-addition/Claisen rearrangement and via 1,4-addition.

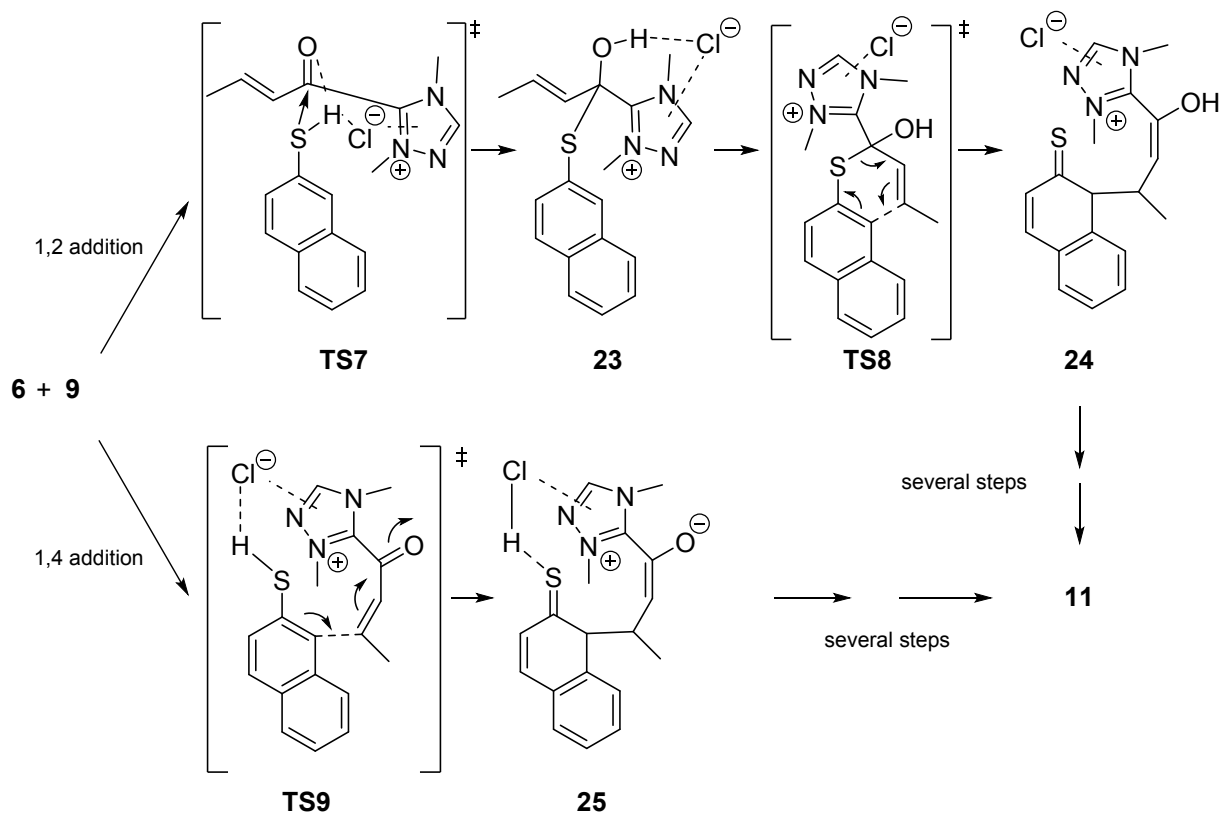

|            | E            | $\Delta E$ | H            | $\Delta H$ | S       | G            | $\Delta G$ |
|------------|--------------|------------|--------------|------------|---------|--------------|------------|
| <b>6</b>   | -1011.656065 |            | -1011.433353 |            | 121.315 | -1011.493893 |            |
| <b>9</b>   | -784.029695  |            | -783.869074  |            | 93.364  | -783.915666  |            |
| <b>6+9</b> | -1795.685761 | 0.0        | -1795.302427 | 0.0        | 214.679 | -1795.409559 | 0.0        |
| <b>TS7</b> | -1795.665399 | 12.8       | -1795.284430 | 11.3       | 168.075 | -1795.368306 | 25.9       |
| <b>23</b>  | -1795.703624 | -11.2      | -1795.315697 | -8.3       | 165.883 | -1795.398479 | 7.0        |
| <b>TS8</b> | -1795.666118 | 12.3       | -1795.281663 | 13.0       | 158.965 | -1795.360992 | 30.5       |
| <b>24</b>  | -1795.697422 | -7.3       | -1795.308265 | -3.7       | 167.305 | -1795.391756 | 11.2       |
| <b>TS9</b> | -1795.661078 | 15.5       | -1795.281317 | 13.2       | 155.080 | -1795.358708 | 31.9       |
| <b>25</b>  | -1795.665993 | 12.4       | -1795.281420 | 13.2       | 164.540 | -1795.363532 | 28.9       |

**Table S5.** Absolute energies (E, H, G in hartree and S in Cal/Mol-Kelvin) and relative energies ( $\Delta E$ ,  $\Delta H$  and  $\Delta G$  in Kcal/Mol), in toluene, of **TSa-c** involved in the 1,4-additions of methoxy substituted  $\beta$ -naphthalenethiols **26a-c** to IP **6**.

|              | E            | $\Delta E$ | H            | $\Delta H$ | S       | G            | $\Delta G$ |
|--------------|--------------|------------|--------------|------------|---------|--------------|------------|
| <b>6</b>     | -1011,656065 |            | -1011,433353 |            | 121,315 | -1011,493893 |            |
| <b>26a</b>   | -898.531563  |            | -898.334970  |            | 105.734 | -898.387735  |            |
| <b>6+26a</b> | -1910.187628 |            | -1909.768323 |            | 227.049 | -1909.881628 |            |
| <b>TS10a</b> | -1910.172689 | 9.4        | -1909.755069 | 8.3        | 173.180 | -1909.841492 | 25.2       |
| <b>26b</b>   | -898.531396  |            | -898.334423  |            | 104.888 | -898.386766  |            |
| <b>6+26b</b> | -1910.187461 |            | -1909.767776 |            | 226.203 | -1909.880659 |            |
| <b>TS10b</b> | -1910.163612 | 15.0       | -1909.747836 | 12.5       | 169.933 | -1909.832639 | 30.1       |
| <b>26c</b>   | -898.5312942 |            | -898.335967  |            | 103.428 | -898.387581  |            |
| <b>6+26c</b> | -1910.187359 |            | -1909.769320 |            | 224.743 | -1909.881474 |            |
| <b>TS10c</b> | -1910.166091 | 13.3       | -1909.749942 | 12.2       | 168.800 | -1909.83418  | 29.7       |

## Z-Matrix

### Compound 3

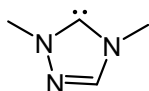

E=-320,748475

| Center Number | Atomic Number | Atomic Type | Coordinates (Angstroms) |           |           |
|---------------|---------------|-------------|-------------------------|-----------|-----------|
|               |               |             | X                       | Y         | Z         |
| 1             | 6             | 0           | 0.000000                | 0.000000  | 0.000000  |
| 2             | 6             | 0           | 0.000000                | 0.000000  | 2.222882  |
| 3             | 1             | 0           | 0.376558                | 0.000000  | 3.227253  |
| 4             | 7             | 0           | 0.778722                | 0.000505  | 1.113715  |
| 5             | 7             | 0           | -1.214420               | -0.004432 | 0.554470  |
| 6             | 7             | 0           | -1.245596               | -0.002908 | 1.909130  |
| 7             | 6             | 0           | 2.218310                | 0.007258  | 1.100100  |
| 8             | 1             | 0           | 2.603062                | 0.887720  | 1.603735  |
| 9             | 1             | 0           | 2.611499                | -0.882016 | 1.581273  |
| 10            | 1             | 0           | 2.532931                | 0.021897  | 0.066171  |
| 11            | 6             | 0           | -2.460604               | -0.020034 | -0.158026 |
| 12            | 1             | 0           | -3.022022               | -0.914620 | 0.088158  |
| 13            | 1             | 0           | -3.050246               | 0.852920  | 0.099490  |
| 14            | 1             | 0           | -2.231302               | -0.009602 | -1.214104 |

### Compound 6

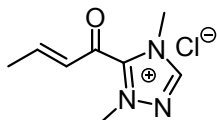

E=-1011,656065

| Center Number | Atomic Number | Atomic Type | Coordinates (Angstroms) |           |           |
|---------------|---------------|-------------|-------------------------|-----------|-----------|
|               |               |             | X                       | Y         | Z         |
| 1             | 6             | 0           | 0.000000                | 0.000000  | 0.000000  |
| 2             | 6             | 0           | 0.000000                | 0.000000  | 1.476971  |
| 3             | 6             | 0           | 1.087982                | 0.000000  | 2.238613  |
| 4             | 6             | 0           | 0.942827                | -0.046978 | 3.687734  |
| 5             | 8             | 0           | -0.073372               | -0.324780 | 4.268870  |
| 6             | 6             | 0           | 2.093263                | 0.360232  | 4.558260  |
| 7             | 7             | 0           | 2.207175                | -0.004696 | 5.836139  |
| 8             | 6             | 0           | 3.265389                | 0.672565  | 6.324829  |
| 9             | 7             | 0           | 3.764245                | 1.474036  | 5.448266  |
| 10            | 7             | 0           | 3.005770                | 1.290016  | 4.358790  |
| 11            | 6             | 0           | 1.498763                | -1.087055 | 6.489572  |
| 12            | 6             | 0           | 3.368092                | 1.961170  | 3.133867  |
| 13            | 1             | 0           | 1.004550                | 0.019321  | -0.406640 |
| 14            | 1             | 0           | -0.506613               | -0.889847 | -0.368337 |
| 15            | 1             | 0           | -0.556248               | 0.852748  | -0.383587 |
| 16            | 1             | 0           | -0.958974               | -0.021144 | 1.976771  |
| 17            | 1             | 0           | 2.080294                | -0.019271 | 1.824510  |
| 18            | 1             | 0           | 3.632722                | 0.553635  | 7.324170  |

|    |    |   |          |           |          |
|----|----|---|----------|-----------|----------|
| 19 | 1  | 0 | 0.476906 | -0.797955 | 6.685268 |
| 20 | 1  | 0 | 1.530410 | -1.947514 | 5.831710 |
| 21 | 1  | 0 | 2.018909 | -1.310170 | 7.410761 |
| 22 | 1  | 0 | 3.977431 | 2.808441  | 3.411799 |
| 23 | 1  | 0 | 2.478251 | 2.294020  | 2.617067 |
| 24 | 1  | 0 | 3.936741 | 1.279107  | 2.511020 |
| 25 | 17 | 0 | 3.296177 | -1.896549 | 3.550363 |

Compound 7

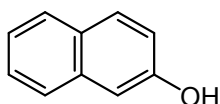

E=-460,995574

| Center Number | Atomic Number | Atomic Type | Coordinates (Angstroms) |           |          |
|---------------|---------------|-------------|-------------------------|-----------|----------|
|               |               |             | X                       | Y         | Z        |
| 1             | 6             | 0           | 1.401504                | 0.544323  | 0.000000 |
| 2             | 6             | 0           | 1.983265                | -0.687230 | 0.000000 |
| 3             | 6             | 0           | 1.187750                | -1.848390 | 0.000000 |
| 4             | 6             | 0           | -0.165041               | -1.745062 | 0.000000 |
| 5             | 6             | 0           | -0.802588               | -0.487688 | 0.000000 |
| 6             | 6             | 0           | 0.000000                | 0.673981  | 0.000000 |
| 7             | 6             | 0           | -2.203015               | -0.356287 | 0.000000 |
| 8             | 6             | 0           | -0.633006               | 1.931792  | 0.000000 |
| 9             | 6             | 0           | -1.991034               | 2.027999  | 0.000000 |
| 10            | 6             | 0           | -2.788214               | 0.872830  | 0.000000 |
| 11            | 8             | 0           | 3.316230                | -0.880714 | 0.000000 |
| 12            | 1             | 0           | 2.011991                | 1.435219  | 0.000000 |
| 13            | 1             | 0           | 1.682516                | -2.805027 | 0.000000 |
| 14            | 1             | 0           | -0.773423               | -2.635835 | 0.000000 |
| 15            | 1             | 0           | -2.806546               | -1.250629 | 0.000000 |
| 16            | 1             | 0           | -0.022704               | 2.821369  | 0.000000 |
| 17            | 1             | 0           | -2.460652               | 2.998268  | 0.000000 |
| 18            | 1             | 0           | -3.861854               | 0.963629  | 0.000000 |
| 19            | 1             | 0           | 3.763107                | -0.038882 | 0.000000 |

Compound 9

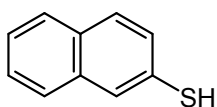

E=-784,029695

| Center Number | Atomic Number | Atomic Type | Coordinates (Angstroms) |           |           |
|---------------|---------------|-------------|-------------------------|-----------|-----------|
|               |               |             | X                       | Y         | Z         |
| 1             | 6             | 0           | 0.000000                | 0.000000  | 0.000000  |
| 2             | 6             | 0           | 0.000000                | 0.000000  | 1.362040  |
| 3             | 6             | 0           | 1.223414                | 0.000000  | 2.062675  |
| 4             | 6             | 0           | 2.399936                | 0.019456  | 1.384042  |
| 5             | 6             | 0           | 2.430071                | 0.009673  | -0.024721 |
| 6             | 6             | 0           | 1.206111                | -0.008915 | -0.724540 |
| 7             | 6             | 0           | 3.634164                | 0.015051  | -0.752248 |
| 8             | 6             | 0           | 1.223911                | -0.018384 | -2.132286 |

|    |    |   |           |           |           |
|----|----|---|-----------|-----------|-----------|
| 9  | 6  | 0 | 2.403660  | -0.013188 | -2.810292 |
| 10 | 6  | 0 | 3.622341  | 0.003460  | -2.113549 |
| 11 | 1  | 0 | -0.932822 | 0.014115  | -0.540979 |
| 12 | 1  | 0 | 1.219078  | -0.017839 | 3.139937  |
| 13 | 1  | 0 | 3.333269  | 0.028205  | 1.924612  |
| 14 | 1  | 0 | 4.567886  | 0.028212  | -0.212341 |
| 15 | 1  | 0 | 0.285689  | -0.030246 | -2.664011 |
| 16 | 1  | 0 | 2.406941  | -0.021721 | -3.887895 |
| 17 | 1  | 0 | 4.549722  | 0.007233  | -2.662291 |
| 18 | 16 | 0 | -1.541830 | -0.088017 | 2.220718  |
| 19 | 1  | 0 | -1.221226 | 0.750978  | 3.209624  |

Compound 10

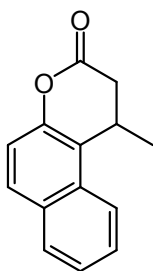

E=-691,015351

| Center Number | Atomic Number | Atomic Type | Coordinates (Angstroms) |           |           |
|---------------|---------------|-------------|-------------------------|-----------|-----------|
|               |               |             | X                       | Y         | Z         |
| 1             | 6             | 0           | 0.000000                | 0.000000  | 0.000000  |
| 2             | 6             | 0           | 0.000000                | 0.000000  | 1.485612  |
| 3             | 6             | 0           | 1.358670                | 0.000000  | 2.175892  |
| 4             | 6             | 0           | 1.126906                | -0.601589 | 3.559355  |
| 5             | 6             | 0           | 2.358221                | -0.767033 | 1.357870  |
| 6             | 6             | 0           | 2.032585                | -1.208223 | 0.108776  |
| 7             | 6             | 0           | 3.669435                | -1.053902 | 1.829726  |
| 8             | 6             | 0           | 2.855419                | -2.071985 | -0.629149 |
| 9             | 6             | 0           | 4.048813                | -2.458619 | -0.121369 |
| 10            | 6             | 0           | 4.503449                | -1.934269 | 1.104537  |
| 11            | 6             | 0           | 4.213494                | -0.428841 | 2.970219  |
| 12            | 6             | 0           | 5.788551                | -2.235483 | 1.589837  |
| 13            | 6             | 0           | 5.474471                | -0.714412 | 3.400066  |
| 14            | 6             | 0           | 6.265757                | -1.649214 | 2.720960  |
| 15            | 1             | 0           | 1.703188                | 1.028996  | 2.286222  |
| 16            | 8             | 0           | -0.779212               | 0.567451  | -0.692442 |
| 17            | 1             | 0           | 0.826628                | -1.641392 | 3.457526  |
| 18            | 1             | 0           | 0.321864                | -0.066784 | 4.056608  |
| 19            | 1             | 0           | 1.994530                | -0.572088 | 4.203440  |
| 20            | 8             | 0           | 0.910358                | -0.810435 | -0.570688 |
| 21            | 1             | 0           | 2.504972                | -2.405590 | -1.590843 |
| 22            | 1             | 0           | 4.681602                | -3.138023 | -0.669110 |
| 23            | 1             | 0           | 3.641614                | 0.322630  | 3.485395  |
| 24            | 1             | 0           | 6.398309                | -2.928564 | 1.031879  |
| 25            | 1             | 0           | 7.255171                | -1.879514 | 3.079584  |
| 26            | 1             | 0           | 5.870277                | -0.207787 | 4.265042  |
| 27            | 1             | 0           | -0.514770               | -0.924742 | 1.753241  |
| 28            | 1             | 0           | -0.621196               | 0.819592  | 1.822943  |

Compound 14

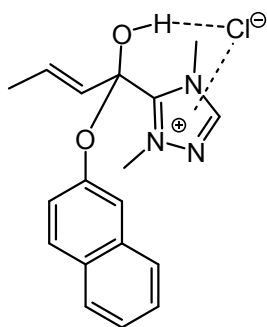

E=-1472,670223

| Center Number | Atomic Number | Atomic Type | Coordinates (Angstroms) |           |           |
|---------------|---------------|-------------|-------------------------|-----------|-----------|
|               |               |             | X                       | Y         | Z         |
| 1             | 6             | 0           | 0.000000                | 0.000000  | 0.000000  |
| 2             | 6             | 0           | 0.000000                | 0.000000  | 1.320503  |
| 3             | 6             | 0           | 1.253228                | 0.000000  | 2.145549  |
| 4             | 8             | 0           | 1.175722                | 0.985307  | 3.150639  |
| 5             | 8             | 0           | 2.342419                | 0.126089  | 1.349719  |
| 6             | 6             | 0           | 1.328871                | -1.296031 | 2.936249  |
| 7             | 6             | 0           | 1.084192                | 2.289233  | 2.734050  |
| 8             | 7             | 0           | 1.577481                | -2.484680 | 2.383760  |
| 9             | 7             | 0           | 1.099167                | -1.523924 | 4.212756  |
| 10            | 6             | 0           | -0.128117               | 2.901265  | 2.723817  |
| 11            | 6             | 0           | 2.254831                | 2.986672  | 2.400122  |
| 12            | 6             | 0           | 1.534744                | -3.383854 | 3.389242  |
| 13            | 6             | 0           | 2.030266                | -2.759494 | 1.035708  |
| 14            | 7             | 0           | 1.237802                | -2.824060 | 4.507302  |
| 15            | 6             | 0           | 0.909568                | -0.603105 | 5.317829  |
| 16            | 6             | 0           | -1.217673               | 0.023834  | -0.845341 |
| 17            | 1             | 0           | 0.957442                | 0.015550  | -0.501256 |
| 18            | 1             | 0           | -0.920796               | -0.001098 | 1.885853  |
| 19            | 1             | 0           | 3.136102                | -0.091248 | 1.897229  |
| 20            | 1             | 0           | -1.010831               | 2.346231  | 2.997380  |
| 21            | 1             | 0           | 1.722041                | -4.429868 | 3.255571  |
| 22            | 1             | 0           | 1.410443                | -2.226679 | 0.329433  |
| 23            | 1             | 0           | 3.061367                | -2.441372 | 0.944083  |
| 24            | 1             | 0           | 1.946583                | -3.825052 | 0.870594  |
| 25            | 1             | 0           | 0.075176                | 0.052392  | 5.122238  |
| 26            | 1             | 0           | 0.723230                | -1.222082 | 6.182750  |
| 27            | 1             | 0           | 1.814418                | -0.024246 | 5.446627  |
| 28            | 1             | 0           | -2.124356               | 0.001023  | -0.250254 |
| 29            | 1             | 0           | -1.231033               | 0.920742  | -1.460314 |
| 30            | 1             | 0           | -1.229224               | -0.822284 | -1.528761 |
| 31            | 17            | 0           | 4.288090                | -0.905584 | 3.298852  |
| 32            | 6             | 0           | 2.173843                | 4.298783  | 2.053406  |
| 33            | 1             | 0           | 3.067865                | 4.845780  | 1.799617  |
| 34            | 6             | 0           | -0.233963               | 4.258600  | 2.369956  |
| 35            | 6             | 0           | 0.935593                | 4.970334  | 2.025327  |
| 36            | 6             | 0           | 0.826989                | 6.329879  | 1.674596  |
| 37            | 1             | 0           | 1.723087                | 6.870729  | 1.413880  |
| 38            | 6             | 0           | -0.383018               | 6.951899  | 1.664853  |
| 39            | 1             | 0           | -0.454048               | 7.992756  | 1.395113  |
| 40            | 6             | 0           | -1.472265               | 4.928367  | 2.351839  |
| 41            | 1             | 0           | -2.363288               | 4.381416  | 2.617405  |
| 42            | 6             | 0           | -1.545560               | 6.242496  | 2.007315  |
| 43            | 1             | 0           | -2.498562               | 6.745644  | 1.997006  |
| 44            | 1             | 0           | 3.196061                | 2.465799  | 2.439678  |

Compound 15

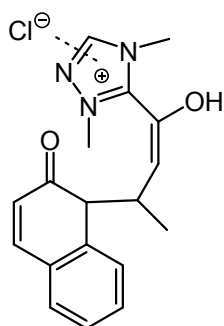

E=-1472,676465

| Center Number | Atomic Number | Atomic Type | Coordinates (Angstroms) |           |           |
|---------------|---------------|-------------|-------------------------|-----------|-----------|
|               |               |             | X                       | Y         | Z         |
| 1             | 6             | 0           | 0.000000                | 0.000000  | 0.000000  |
| 2             | 6             | 0           | 0.000000                | 0.000000  | 1.489351  |
| 3             | 6             | 0           | 1.136180                | 0.000000  | 2.176606  |
| 4             | 6             | 0           | 1.111629                | 0.040561  | 3.636298  |
| 5             | 7             | 0           | 0.494165                | 0.907303  | 4.411636  |
| 6             | 7             | 0           | 1.704569                | -0.832532 | 4.452411  |
| 7             | 7             | 0           | 0.686042                | 0.630387  | 5.706695  |
| 8             | 6             | 0           | -0.232953               | 2.099988  | 4.038268  |
| 9             | 6             | 0           | 1.433728                | -0.418812 | 5.707382  |
| 10            | 6             | 0           | 2.585470                | -1.909282 | 4.053079  |
| 11            | 6             | 0           | -1.307920               | -0.492643 | -0.583413 |
| 12            | 6             | 0           | 0.398926                | 1.413263  | -0.526012 |
| 13            | 6             | 0           | -0.764209               | 2.343504  | -0.303597 |
| 14            | 8             | 0           | -1.105190               | 2.645814  | 0.818827  |
| 15            | 6             | 0           | -1.503082               | 2.802914  | -1.469002 |
| 16            | 1             | 0           | -0.935514               | 0.032952  | 2.023595  |
| 17            | 8             | 0           | 2.334298                | -0.095629 | 1.596919  |
| 18            | 1             | 0           | -1.248957               | 2.018110  | 4.403240  |
| 19            | 1             | 0           | -0.235230               | 2.198842  | 2.960903  |
| 20            | 1             | 0           | 0.259305                | 2.946905  | 4.497714  |
| 21            | 1             | 0           | 1.795106                | -0.913510 | 6.586090  |
| 22            | 1             | 0           | 2.628026                | -2.630709 | 4.857443  |
| 23            | 1             | 0           | 3.568020                | -1.497289 | 3.854494  |
| 24            | 1             | 0           | 2.189027                | -2.377179 | 3.161888  |
| 25            | 1             | 0           | 3.011563                | 0.363961  | 2.162987  |
| 26            | 1             | 0           | -2.147656               | 0.093545  | -0.217146 |
| 27            | 1             | 0           | -1.479767               | -1.529003 | -0.309385 |
| 28            | 1             | 0           | -1.297274               | -0.428083 | -1.668237 |
| 29            | 1             | 0           | 1.215997                | 1.751741  | 0.107424  |
| 30            | 17            | 0           | 3.993086                | 1.292175  | 3.568539  |
| 31            | 6             | 0           | -1.072227               | 2.552748  | -2.708290 |
| 32            | 1             | 0           | -1.634675               | 2.921099  | -3.553713 |
| 33            | 6             | 0           | 0.891143                | 1.315229  | -1.933852 |
| 34            | 6             | 0           | 0.150035                | 1.833042  | -2.991189 |
| 35            | 1             | 0           | -2.395725               | 3.375393  | -1.278911 |
| 36            | 6             | 0           | 2.090411                | 0.679421  | -2.194189 |
| 37            | 1             | 0           | 2.668899                | 0.295115  | -1.366882 |
| 38            | 6             | 0           | 0.611586                | 1.687077  | -4.294110 |
| 39            | 1             | 0           | 0.029546                | 2.091282  | -5.107445 |
| 40            | 6             | 0           | 1.802933                | 1.043814  | -4.544568 |
| 41            | 1             | 0           | 2.157304                | 0.937165  | -5.556248 |
| 42            | 6             | 0           | 2.547154                | 0.544982  | -3.490000 |
| 43            | 1             | 0           | 3.487444                | 0.053429  | -3.677996 |
| 44            | 1             | 0           | 0.802591                | -0.656573 | -0.327270 |



Compound 16

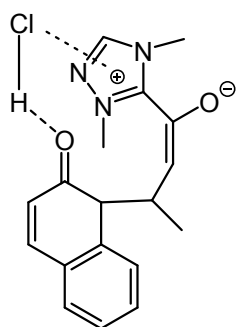

E=-1472,645736

| Center Number | Atomic Number | Atomic Type | Coordinates (Angstroms) |           |           |
|---------------|---------------|-------------|-------------------------|-----------|-----------|
|               |               |             | X                       | Y         | Z         |
| 1             | 6             | 0           | 0.000000                | 0.000000  | 0.000000  |
| 2             | 6             | 0           | 0.000000                | 0.000000  | 1.457502  |
| 3             | 6             | 0           | 1.233325                | 0.000000  | 2.052406  |
| 4             | 6             | 0           | 1.312900                | 0.114761  | 3.530249  |
| 5             | 7             | 0           | 0.496869                | -0.323116 | 4.473315  |
| 6             | 7             | 0           | 2.340266                | 0.672373  | 4.176954  |
| 7             | 7             | 0           | 0.949854                | -0.035901 | 5.702291  |
| 8             | 6             | 0           | -0.751786               | -1.032053 | 4.340401  |
| 9             | 6             | 0           | 2.065445                | 0.572268  | 5.493047  |
| 10            | 6             | 0           | 3.491105                | 1.343871  | 3.600461  |
| 11            | 6             | 0           | -1.315886               | -0.339428 | -0.651219 |
| 12            | 6             | 0           | 0.630309                | 1.442422  | -0.551797 |
| 13            | 6             | 0           | -0.475941               | 2.374090  | -0.562883 |
| 14            | 8             | 0           | -0.982425               | 2.828345  | 0.513490  |
| 15            | 6             | 0           | -1.113768               | 2.717485  | -1.777619 |
| 16            | 1             | 0           | -0.906352               | 0.173873  | 2.009999  |
| 17            | 8             | 0           | 2.339100                | -0.019768 | 1.465073  |
| 18            | 1             | 0           | -0.869497               | -1.635399 | 5.229108  |
| 19            | 1             | 0           | -0.712730               | -1.652934 | 3.456176  |
| 20            | 1             | 0           | -1.571676               | -0.327806 | 4.261606  |
| 21            | 1             | 0           | 2.706062                | 0.956177  | 6.260941  |
| 22            | 1             | 0           | 4.042781                | 1.792346  | 4.416383  |
| 23            | 1             | 0           | 3.136639                | 2.108783  | 2.923205  |
| 24            | 1             | 0           | 4.094806                | 0.626859  | 3.065779  |
| 25            | 1             | 0           | -0.373620               | 2.818444  | 1.338220  |
| 26            | 1             | 0           | -2.117857               | 0.297032  | -0.284609 |
| 27            | 1             | 0           | -1.574898               | -1.367233 | -0.415339 |
| 28            | 1             | 0           | -1.266499               | -0.245189 | -1.732803 |
| 29            | 1             | 0           | 1.370581                | 1.661046  | 0.215244  |
| 30            | 17            | 0           | 0.673364                | 3.237430  | 2.792973  |
| 31            | 6             | 0           | -0.567012               | 2.344021  | -2.954906 |
| 32            | 1             | 0           | -1.044858               | 2.642412  | -3.875819 |
| 33            | 6             | 0           | 1.264401                | 1.196692  | -1.857490 |
| 34            | 6             | 0           | 0.644960                | 1.593235  | -3.041841 |
| 35            | 1             | 0           | -2.001047               | 3.324285  | -1.726568 |
| 36            | 6             | 0           | 2.459487                | 0.496679  | -1.910413 |
| 37            | 1             | 0           | 2.912885                | 0.187743  | -0.980241 |
| 38            | 6             | 0           | 1.232532                | 1.283791  | -4.270276 |
| 39            | 1             | 0           | 0.746065                | 1.595212  | -5.180960 |
| 40            | 6             | 0           | 2.417721                | 0.595518  | -4.312095 |
| 41            | 1             | 0           | 2.873096                | 0.359035  | -5.259033 |
| 42            | 6             | 0           | 3.031961                | 0.204880  | -3.127335 |
| 43            | 1             | 0           | 3.965815                | -0.331905 | -3.162706 |
| 44            | 1             | 0           | 0.779945                | -0.670753 | -0.347754 |

Compound 17

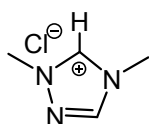

E=-781,674861

| Center Number | Atomic Number | Atomic Type | Coordinates (Angstroms) |           |           |
|---------------|---------------|-------------|-------------------------|-----------|-----------|
|               |               |             | X                       | Y         | Z         |
| 1             | 6             | 0           | 0.000000                | 0.000000  | 0.000000  |
| 2             | 6             | 0           | 0.000000                | 0.000000  | 2.144056  |
| 3             | 1             | 0           | 0.361702                | 0.000000  | 3.152489  |
| 4             | 7             | 0           | 0.804009                | -0.012098 | 1.054423  |
| 5             | 7             | 0           | -1.223559               | 0.018276  | 0.466401  |
| 6             | 7             | 0           | -1.244463               | 0.019150  | 1.806734  |
| 7             | 6             | 0           | 2.256428                | -0.037223 | 1.010760  |
| 8             | 1             | 0           | 2.612636                | -0.941748 | 1.486177  |
| 9             | 1             | 0           | 2.551646                | -0.023730 | -0.032167 |
| 10            | 1             | 0           | 2.644004                | 0.834882  | 1.520860  |
| 11            | 6             | 0           | -2.453423               | 0.034373  | -0.289279 |
| 12            | 1             | 0           | -3.009370               | 0.928419  | -0.039888 |
| 13            | 1             | 0           | -2.204213               | 0.031397  | -1.341155 |
| 14            | 1             | 0           | -3.032100               | -0.845288 | -0.040441 |
| 15            | 1             | 0           | 0.354499                | -0.011337 | -1.036169 |
| 16            | 17            | 0           | 1.824860                | -0.068318 | -2.590960 |

Compound 18

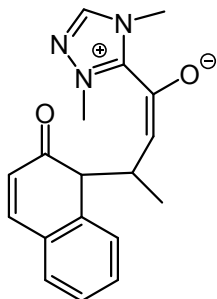

E=-1011,746992

| Center Number | Atomic Number | Atomic Type | Coordinates (Angstroms) |           |           |
|---------------|---------------|-------------|-------------------------|-----------|-----------|
|               |               |             | X                       | Y         | Z         |
| 1             | 6             | 0           | 0.000000                | 0.000000  | 0.000000  |
| 2             | 6             | 0           | 0.000000                | 0.000000  | 1.482160  |
| 3             | 6             | 0           | 1.197870                | 0.000000  | 2.121668  |
| 4             | 6             | 0           | 1.144143                | 0.163295  | 3.596838  |
| 5             | 7             | 0           | 0.358718                | -0.415028 | 4.491775  |
| 6             | 7             | 0           | 1.976716                | 0.934837  | 4.307587  |
| 7             | 7             | 0           | 0.644751                | -0.024369 | 5.745463  |
| 8             | 6             | 0           | -0.690107               | -1.380918 | 4.277241  |
| 9             | 6             | 0           | 1.627232                | 0.794446  | 5.605534  |
| 10            | 6             | 0           | 2.998529                | 1.815013  | 3.772391  |
| 11            | 6             | 0           | -1.359023               | -0.291533 | -0.598501 |
| 12            | 6             | 0           | 0.633638                | 1.334541  | -0.548811 |

|    |   |   |           |           |           |
|----|---|---|-----------|-----------|-----------|
| 13 | 6 | 0 | -0.347641 | 2.446970  | -0.355718 |
| 14 | 8 | 0 | -0.562247 | 2.918845  | 0.738458  |
| 15 | 6 | 0 | -1.084897 | 2.905082  | -1.530434 |
| 16 | 1 | 0 | -0.920116 | 0.139234  | 2.025486  |
| 17 | 8 | 0 | 2.354764  | -0.039178 | 1.619101  |
| 18 | 1 | 0 | -0.664965 | -2.079991 | 5.101747  |
| 19 | 1 | 0 | -0.508100 | -1.880223 | 3.335435  |
| 20 | 1 | 0 | -1.652777 | -0.884285 | 4.243833  |
| 21 | 1 | 0 | 2.118738  | 1.303789  | 6.410060  |
| 22 | 1 | 0 | 3.757717  | 1.957008  | 4.529981  |
| 23 | 1 | 0 | 2.552753  | 2.766424  | 3.507741  |
| 24 | 1 | 0 | 3.402955  | 1.338932  | 2.889999  |
| 25 | 1 | 0 | -2.108384 | 0.405022  | -0.227638 |
| 26 | 1 | 0 | -1.678495 | -1.295039 | -0.331694 |
| 27 | 1 | 0 | -1.340312 | -0.217739 | -1.683177 |
| 28 | 1 | 0 | 1.495942  | 1.498955  | 0.094240  |
| 29 | 6 | 0 | -0.722939 | 2.544780  | -2.763848 |
| 30 | 1 | 0 | -1.261527 | 2.930175  | -3.617602 |
| 31 | 6 | 0 | 1.095329  | 1.127362  | -1.949762 |
| 32 | 6 | 0 | 0.403478  | 1.675890  | -3.026415 |
| 33 | 1 | 0 | -1.897438 | 3.590382  | -1.351622 |
| 34 | 6 | 0 | 2.202801  | 0.333329  | -2.190730 |
| 35 | 1 | 0 | 2.732396  | -0.078676 | -1.343921 |
| 36 | 6 | 0 | 0.821457  | 1.407802  | -4.324807 |
| 37 | 1 | 0 | 0.277116  | 1.836087  | -5.152264 |
| 38 | 6 | 0 | 1.921116  | 0.611754  | -4.554457 |
| 39 | 1 | 0 | 2.241402  | 0.409619  | -5.563223 |
| 40 | 6 | 0 | 2.616732  | 0.078417  | -3.482275 |
| 41 | 1 | 0 | 3.484248  | -0.537476 | -3.655667 |
| 42 | 1 | 0 | 0.704616  | -0.763758 | -0.327788 |

---

Compound 19

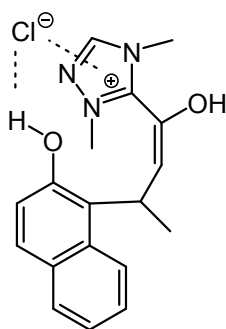

E=-1472,679388

| Center Number | Atomic Number | Atomic Type | Coordinates (Angstroms) |           |           |
|---------------|---------------|-------------|-------------------------|-----------|-----------|
|               |               |             | X                       | Y         | Z         |
| 1             | 6             | 0           | 0.000000                | 0.000000  | 0.000000  |
| 2             | 6             | 0           | 0.000000                | 0.000000  | 1.503306  |
| 3             | 6             | 0           | 1.120341                | 0.000000  | 2.221547  |
| 4             | 6             | 0           | 1.026127                | -0.040476 | 3.690392  |
| 5             | 7             | 0           | 0.644038                | 0.922981  | 4.498434  |
| 6             | 7             | 0           | 1.262019                | -1.102057 | 4.457243  |
| 7             | 7             | 0           | 0.661102                | 0.527482  | 5.775789  |
| 8             | 6             | 0           | 0.472134                | 2.322738  | 4.186569  |
| 9             | 6             | 0           | 1.045657                | -0.701012 | 5.729707  |
| 10            | 6             | 0           | 1.813239                | -2.365434 | 4.016745  |
| 11            | 6             | 0           | -1.406757               | -0.152822 | -0.563423 |
| 12            | 6             | 0           | 0.706758                | 1.195644  | -0.598666 |
| 13            | 6             | 0           | 0.293656                | 2.461396  | -0.275413 |
| 14            | 8             | 0           | -0.674001               | 2.712951  | 0.640131  |
| 15            | 6             | 0           | 0.839547                | 3.601250  | -0.884044 |
| 16            | 1             | 0           | -0.940803               | -0.044169 | 2.034409  |
| 17            | 8             | 0           | 2.328033                | -0.075406 | 1.693061  |
| 18            | 1             | 0           | -0.351932               | 2.703702  | 4.772979  |
| 19            | 1             | 0           | 0.266849                | 2.426727  | 3.130433  |
| 20            | 1             | 0           | 1.391011                | 2.840024  | 4.435604  |
| 21            | 1             | 0           | 1.172457                | -1.336595 | 6.582701  |
| 22            | 1             | 0           | 1.170906                | -3.175689 | 4.335910  |
| 23            | 1             | 0           | 2.808989                | -2.470254 | 4.428588  |
| 24            | 1             | 0           | 1.881674                | -2.351543 | 2.938210  |
| 25            | 1             | 0           | 3.013014                | 0.151703  | 2.378469  |
| 26            | 1             | 0           | -2.007969               | 0.735683  | -0.387973 |
| 27            | 1             | 0           | -1.913019               | -1.002655 | -0.113058 |
| 28            | 1             | 0           | -1.362885               | -0.310034 | -1.635685 |
| 29            | 1             | 0           | -0.853845               | 1.918394  | 1.136551  |
| 30            | 17            | 0           | 3.930970                | 0.600604  | 4.038055  |
| 31            | 6             | 0           | 1.809364                | 3.469862  | -1.819595 |
| 32            | 1             | 0           | 2.230489                | 4.341509  | -2.294511 |
| 33            | 6             | 0           | 1.746585                | 1.050358  | -1.557571 |
| 34            | 6             | 0           | 2.294873                | 2.197529  | -2.175104 |
| 35            | 1             | 0           | 0.462862                | 4.564764  | -0.584389 |
| 36            | 6             | 0           | 2.277247                | -0.201115 | -1.937255 |
| 37            | 1             | 0           | 1.911746                | -1.106739 | -1.489220 |
| 38            | 6             | 0           | 3.312708                | 2.062472  | -3.136475 |
| 39            | 1             | 0           | 3.710219                | 2.957351  | -3.589217 |
| 40            | 6             | 0           | 3.791737                | 0.838596  | -3.485282 |
| 41            | 1             | 0           | 4.573745                | 0.747047  | -4.220638 |
| 42            | 6             | 0           | 3.263249                | -0.303983 | -2.870739 |
| 43            | 1             | 0           | 3.646131                | -1.276950 | -3.132645 |
| 44            | 1             | 0           | 0.555667                | -0.885094 | -0.287318 |

Compound 20

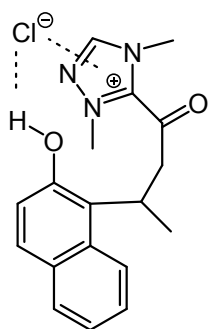

E=-1472,691489

| Center Number | Atomic Number | Atomic Type | Coordinates (Angstroms) |           |           |
|---------------|---------------|-------------|-------------------------|-----------|-----------|
|               |               |             | X                       | Y         | Z         |
| 1             | 6             | 0           | 0.000000                | 0.000000  | 0.000000  |
| 2             | 6             | 0           | 0.000000                | 0.000000  | 1.486322  |
| 3             | 6             | 0           | 1.436726                | 0.000000  | 2.052153  |
| 4             | 6             | 0           | 1.480495                | 0.604579  | 3.449122  |
| 5             | 6             | 0           | 2.111083                | -1.343605 | 1.935786  |
| 6             | 6             | 0           | 0.737916                | -1.097814 | -0.721972 |
| 7             | 7             | 0           | 0.575157                | -2.403295 | -0.687642 |
| 8             | 7             | 0           | 1.716548                | -0.859972 | -1.589335 |
| 9             | 7             | 0           | 1.439146                | -3.020276 | -1.497537 |
| 10            | 6             | 0           | -0.422191               | -3.188618 | 0.006150  |
| 11            | 6             | 0           | 2.141105                | -2.069433 | -2.020468 |
| 12            | 6             | 0           | 2.225239                | 0.434586  | -2.017206 |
| 13            | 6             | 0           | 3.256021                | -1.428601 | 1.170756  |
| 14            | 6             | 0           | 1.601906                | -2.528492 | 2.531618  |
| 15            | 6             | 0           | 3.903636                | -2.662015 | 0.953047  |
| 16            | 6             | 0           | 3.393199                | -3.799642 | 1.478501  |
| 17            | 6             | 0           | 2.230820                | -3.770933 | 2.270003  |
| 18            | 6             | 0           | 0.455276                | -2.555103 | 3.359052  |
| 19            | 6             | 0           | 1.682213                | -4.961077 | 2.781866  |
| 20            | 6             | 0           | -0.056763               | -3.724239 | 3.837948  |
| 21            | 6             | 0           | 0.550691                | -4.949593 | 3.538388  |
| 22            | 1             | 0           | 2.016069                | 0.672480  | 1.425863  |
| 23            | 8             | 0           | -0.464355               | 0.861070  | -0.686305 |
| 24            | 1             | 0           | -1.003747               | -3.722145 | -0.734409 |
| 25            | 1             | 0           | -1.066943               | -2.530933 | 0.570431  |
| 26            | 1             | 0           | 0.069826                | -3.884458 | 0.673644  |
| 27            | 1             | 0           | 2.973952                | -2.192200 | -2.684849 |
| 28            | 1             | 0           | 3.241354                | 0.282820  | -2.357848 |
| 29            | 1             | 0           | 2.232579                | 1.108900  | -1.173063 |
| 30            | 1             | 0           | 1.590117                | 0.823725  | -2.802239 |
| 31            | 1             | 0           | 0.895050                | 0.051146  | 4.174456  |
| 32            | 1             | 0           | 1.111941                | 1.626585  | 3.428472  |
| 33            | 1             | 0           | 2.507087                | 0.623112  | 3.799658  |
| 34            | 8             | 0           | 3.743177                | -0.318133 | 0.609397  |
| 35            | 1             | 0           | 4.789362                | -2.672489 | 0.339610  |
| 36            | 1             | 0           | 3.874080                | -4.746423 | 1.291515  |
| 37            | 1             | 0           | -0.027704               | -1.637561 | 3.639569  |
| 38            | 1             | 0           | 2.182181                | -5.890542 | 2.558482  |
| 39            | 1             | 0           | 0.136941                | -5.867584 | 3.921169  |
| 40            | 1             | 0           | -0.932823               | -3.701725 | 4.465533  |
| 41            | 1             | 0           | -0.560094               | -0.854758 | 1.853211  |
| 42            | 1             | 0           | -0.528521               | 0.899842  | 1.783613  |
| 43            | 1             | 0           | 4.392237                | -0.540801 | -0.093235 |
| 44            | 17            | 0           | 5.337571                | -1.080093 | -1.836412 |

Compound 21

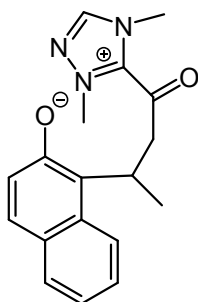

E=-1011,757940

| Center Number | Atomic Number | Atomic Type | Coordinates (Angstroms) |           |           |
|---------------|---------------|-------------|-------------------------|-----------|-----------|
|               |               |             | X                       | Y         | Z         |
| 1             | 6             | 0           | 0.000000                | 0.000000  | 0.000000  |
| 2             | 6             | 0           | 0.000000                | 0.000000  | 1.496411  |
| 3             | 6             | 0           | 1.407988                | 0.000000  | 2.131751  |
| 4             | 6             | 0           | 1.348687                | 0.707110  | 3.473305  |
| 5             | 6             | 0           | 2.002333                | -1.374088 | 2.009135  |
| 6             | 6             | 0           | -0.070758               | -1.261432 | -0.807998 |
| 7             | 7             | 0           | -0.440104               | -2.492680 | -0.493088 |
| 8             | 7             | 0           | 0.147804                | -1.273837 | -2.129174 |
| 9             | 7             | 0           | -0.426320               | -3.301790 | -1.569041 |
| 10            | 6             | 0           | -0.816740               | -3.081436 | 0.777862  |
| 11            | 6             | 0           | -0.059388               | -2.540842 | -2.538132 |
| 12            | 6             | 0           | 0.748159                | -0.217772 | -2.921514 |
| 13            | 6             | 0           | 2.352984                | -1.657782 | 0.682167  |
| 14            | 6             | 0           | 2.105605                | -2.380140 | 2.999388  |
| 15            | 6             | 0           | 2.878670                | -2.941603 | 0.363057  |
| 16            | 6             | 0           | 3.011931                | -3.898615 | 1.308660  |
| 17            | 6             | 0           | 2.622842                | -3.658289 | 2.641847  |
| 18            | 6             | 0           | 1.690700                | -2.235369 | 4.347191  |
| 19            | 6             | 0           | 2.732790                | -4.677601 | 3.602376  |
| 20            | 6             | 0           | 1.801918                | -3.247270 | 5.253436  |
| 21            | 6             | 0           | 2.335069                | -4.489775 | 4.890159  |
| 22            | 1             | 0           | 2.010375                | 0.621324  | 1.472724  |
| 23            | 8             | 0           | -0.095315               | 1.025233  | -0.625523 |
| 24            | 1             | 0           | -1.077258               | -4.105830 | 0.557039  |
| 25            | 1             | 0           | -1.678829               | -2.571295 | 1.187887  |
| 26            | 1             | 0           | 0.017645                | -3.054270 | 1.467688  |
| 27            | 1             | 0           | 0.068426                | -2.862050 | -3.552284 |
| 28            | 1             | 0           | 1.046204                | -0.653047 | -3.866326 |
| 29            | 1             | 0           | 1.613109                | 0.141351  | -2.380425 |
| 30            | 1             | 0           | 0.043318                | 0.585063  | -3.075236 |
| 31            | 1             | 0           | 0.518628                | 0.378264  | 4.092162  |
| 32            | 1             | 0           | 1.209091                | 1.770955  | 3.299962  |
| 33            | 1             | 0           | 2.269668                | 0.578926  | 4.033265  |
| 34            | 8             | 0           | 2.135836                | -0.797025 | -0.248301 |
| 35            | 1             | 0           | 3.160149                | -3.119963 | -0.663001 |
| 36            | 1             | 0           | 3.407125                | -4.870906 | 1.054835  |
| 37            | 1             | 0           | 1.274297                | -1.306804 | 4.680207  |
| 38            | 1             | 0           | 3.141060                | -5.626597 | 3.288568  |
| 39            | 1             | 0           | 2.423436                | -5.280246 | 5.616958  |
| 40            | 1             | 0           | 1.472743                | -3.083658 | 6.267502  |
| 41            | 1             | 0           | -0.579347               | -0.813898 | 1.917364  |
| 42            | 1             | 0           | -0.500978               | 0.929956  | 1.752348  |

Compound 22

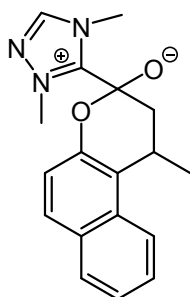

E=-1011,768419

| Center Number | Atomic Number | Atomic Type | Coordinates (Angstroms) |           |           |
|---------------|---------------|-------------|-------------------------|-----------|-----------|
|               |               |             | X                       | Y         | Z         |
| 1             | 6             | 0           | 0.000000                | 0.000000  | 0.000000  |
| 2             | 6             | 0           | 0.000000                | 0.000000  | 1.520961  |
| 3             | 6             | 0           | 1.443397                | 0.000000  | 2.009534  |
| 4             | 6             | 0           | 1.423895                | -0.405651 | 3.479282  |
| 5             | 6             | 0           | 2.298930                | -0.917583 | 1.173101  |
| 6             | 6             | 0           | -1.439167               | -0.165740 | -0.543610 |
| 7             | 7             | 0           | -2.334874               | -1.116668 | -0.352763 |
| 8             | 7             | 0           | -2.034759               | 0.724901  | -1.341126 |
| 9             | 7             | 0           | -3.486104               | -0.869496 | -0.995613 |
| 10            | 6             | 0           | -2.218052               | -2.326532 | 0.429200  |
| 11            | 6             | 0           | -3.277224               | 0.253036  | -1.589413 |
| 12            | 6             | 0           | -1.494116               | 1.957544  | -1.896034 |
| 13            | 6             | 0           | 1.760267                | -1.596396 | 0.108407  |
| 14            | 6             | 0           | 3.681629                | -1.101173 | 1.445686  |
| 15            | 6             | 0           | 2.495394                | -2.576383 | -0.585907 |
| 16            | 6             | 0           | 3.776754                | -2.846700 | -0.246869 |
| 17            | 6             | 0           | 4.416451                | -2.095736 | 0.758489  |
| 18            | 6             | 0           | 4.390857                | -0.287836 | 2.356462  |
| 19            | 6             | 0           | 5.775654                | -2.294657 | 1.056288  |
| 20            | 6             | 0           | 5.715460                | -0.487041 | 2.608895  |
| 21            | 6             | 0           | 6.418090                | -1.516939 | 1.970031  |
| 22            | 1             | 0           | 1.830778                | 1.013179  | 1.910597  |
| 23            | 8             | 0           | 0.613815                | 0.947997  | -0.563235 |
| 24            | 1             | 0           | -2.773816               | -3.097627 | -0.085702 |
| 25            | 1             | 0           | -2.640057               | -2.167812 | 1.414738  |
| 26            | 1             | 0           | -1.173107               | -2.589483 | 0.493380  |
| 27            | 1             | 0           | -3.988764               | 0.759736  | -2.209867 |
| 28            | 1             | 0           | -0.643346               | 1.727123  | -2.517515 |
| 29            | 1             | 0           | -1.154264               | 2.595302  | -1.094930 |
| 30            | 1             | 0           | -2.290503               | 2.426931  | -2.459455 |
| 31            | 1             | 0           | 1.019835                | -1.410612 | 3.577730  |
| 32            | 1             | 0           | 0.783000                | 0.268823  | 4.043141  |
| 33            | 1             | 0           | 2.402899                | -0.403667 | 3.941573  |
| 34            | 8             | 0           | 0.514153                | -1.386337 | -0.340212 |
| 35            | 1             | 0           | 1.999913                | -3.092139 | -1.391898 |
| 36            | 1             | 0           | 4.334839                | -3.609371 | -0.767050 |
| 37            | 1             | 0           | 3.884153                | 0.533434  | 2.833676  |
| 38            | 1             | 0           | 6.307136                | -3.071627 | 0.528325  |
| 39            | 1             | 0           | 7.462257                | -1.673757 | 2.185387  |
| 40            | 1             | 0           | 6.229874                | 0.162349  | 3.298934  |
| 41            | 1             | 0           | -0.516222               | -0.874231 | 1.916306  |
| 42            | 1             | 0           | -0.510888               | 0.887381  | 1.886786  |

Compound 23

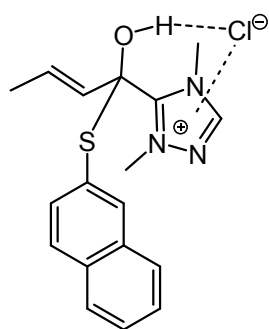

E=-1795,703624

| Center Number | Atomic Number | Atomic Type | Coordinates (Angstroms) |           |           |
|---------------|---------------|-------------|-------------------------|-----------|-----------|
|               |               |             | X                       | Y         | Z         |
| 1             | 6             | 0           | 0.000000                | 0.000000  | 0.000000  |
| 2             | 6             | 0           | 0.000000                | 0.000000  | 1.322083  |
| 3             | 6             | 0           | 1.254212                | 0.000000  | 2.133993  |
| 4             | 8             | 0           | 2.338480                | -0.230226 | 1.344551  |
| 5             | 6             | 0           | 1.154592                | -1.105518 | 3.165540  |
| 6             | 6             | 0           | 1.953048                | 2.564002  | 1.561078  |
| 7             | 7             | 0           | 1.240887                | -2.391992 | 2.810775  |
| 8             | 7             | 0           | 0.857140                | -1.106150 | 4.450076  |
| 9             | 6             | 0           | 1.078940                | 3.207714  | 0.736635  |
| 10            | 6             | 0           | 3.340025                | 2.621431  | 1.320533  |
| 11            | 6             | 0           | 1.045441                | -3.111168 | 3.934515  |
| 12            | 6             | 0           | 1.658741                | -2.940108 | 1.535745  |
| 13            | 7             | 0           | 0.801271                | -2.352268 | 4.942143  |
| 14            | 6             | 0           | 0.771006                | -0.013642 | 5.397050  |
| 15            | 6             | 0           | -1.218669               | 0.084960  | -0.841559 |
| 16            | 1             | 0           | 0.955702                | -0.034739 | -0.502529 |
| 17            | 1             | 0           | -0.919088               | 0.063893  | 1.886397  |
| 18            | 1             | 0           | 3.106818                | -0.389064 | 1.942398  |
| 19            | 1             | 0           | 0.019710                | 3.159728  | 0.930918  |
| 20            | 1             | 0           | 1.086728                | -4.181045 | 3.966359  |
| 21            | 1             | 0           | 1.134634                | -2.436418 | 0.736338  |
| 22            | 1             | 0           | 2.726186                | -2.795218 | 1.428313  |
| 23            | 1             | 0           | 1.415083                | -3.994026 | 1.539385  |
| 24            | 1             | 0           | 0.017910                | 0.698841  | 5.088702  |
| 25            | 1             | 0           | 0.495433                | -0.462873 | 6.339390  |
| 26            | 1             | 0           | 1.740443                | 0.462606  | 5.473908  |
| 27            | 1             | 0           | -2.124579               | 0.075145  | -0.244273 |
| 28            | 1             | 0           | -1.206729               | 0.998027  | -1.433555 |
| 29            | 1             | 0           | -1.260433               | -0.740975 | -1.547789 |
| 30            | 17            | 0           | 4.111808                | -1.017636 | 3.564539  |
| 31            | 6             | 0           | 3.814388                | 3.319686  | 0.257046  |
| 32            | 1             | 0           | 4.875128                | 3.367031  | 0.068823  |
| 33            | 6             | 0           | 1.547952                | 3.937143  | -0.372252 |
| 34            | 6             | 0           | 2.937430                | 3.993309  | -0.616634 |
| 35            | 6             | 0           | 3.403167                | 4.724833  | -1.725119 |
| 36            | 1             | 0           | 4.465010                | 4.768407  | -1.908713 |
| 37            | 6             | 0           | 2.531752                | 5.365192  | -2.551282 |
| 38            | 1             | 0           | 2.900190                | 5.921630  | -3.397466 |
| 39            | 6             | 0           | 0.669896                | 4.610299  | -1.243618 |
| 40            | 1             | 0           | -0.390367               | 4.564913  | -1.049919 |
| 41            | 6             | 0           | 1.149679                | 5.307345  | -2.308953 |
| 42            | 1             | 0           | 0.470967                | 5.819820  | -2.970717 |
| 43            | 1             | 0           | 4.006297                | 2.106939  | 1.993204  |
| 44            | 16            | 0           | 1.371089                | 1.677722  | 2.966396  |



Compound 24

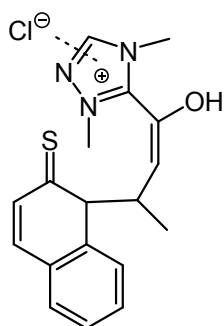

E=-1795,697422

| Center Number | Atomic Number | Atomic Type | Coordinates (Angstroms) |           |           |
|---------------|---------------|-------------|-------------------------|-----------|-----------|
|               |               |             | X                       | Y         | Z         |
| 1             | 6             | 0           | 0.000000                | 0.000000  | 0.000000  |
| 2             | 6             | 0           | 0.000000                | 0.000000  | 1.488786  |
| 3             | 6             | 0           | 1.106437                | 0.000000  | 2.226821  |
| 4             | 8             | 0           | 2.334126                | 0.010997  | 1.718993  |
| 5             | 6             | 0           | 1.018093                | -0.173302 | 3.679565  |
| 6             | 6             | 0           | 0.688537                | 2.379355  | -0.077462 |
| 7             | 7             | 0           | 1.658697                | -1.115337 | 4.376729  |
| 8             | 7             | 0           | 0.286509                | 0.488786  | 4.552102  |
| 9             | 6             | 0           | -0.319648               | 1.413560  | -0.613842 |
| 10            | 6             | 0           | 1.977528                | 2.357086  | -0.711411 |
| 11            | 6             | 0           | 1.297000                | -0.944662 | 5.664823  |
| 12            | 6             | 0           | 2.646472                | -2.044699 | 3.869066  |
| 13            | 7             | 0           | 0.450812                | 0.017070  | 5.793964  |
| 14            | 6             | 0           | -0.560511               | 1.638105  | 4.341663  |
| 15            | 6             | 0           | -0.980399               | -1.052882 | -0.487105 |
| 16            | 1             | 0           | 1.002072                | -0.252287 | -0.339735 |
| 17            | 1             | 0           | -0.951111               | -0.079852 | 1.994336  |
| 18            | 1             | 0           | 2.944865                | 0.466020  | 2.361544  |
| 19            | 1             | 0           | -1.312337               | 1.706144  | -0.284926 |
| 20            | 1             | 0           | 1.670321                | -1.546197 | 6.468739  |
| 21            | 1             | 0           | 2.294017                | -2.466413 | 2.937425  |
| 22            | 1             | 0           | 3.575623                | -1.510085 | 3.712132  |
| 23            | 1             | 0           | 2.776391                | -2.829021 | 4.601874  |
| 24            | 1             | 0           | -0.412469               | 2.002564  | 3.334839  |
| 25            | 1             | 0           | -1.595185               | 1.354684  | 4.491572  |
| 26            | 1             | 0           | -0.274330               | 2.395831  | 5.058075  |
| 27            | 1             | 0           | -2.004370               | -0.771751 | -0.247476 |
| 28            | 1             | 0           | -0.909624               | -1.203273 | -1.557583 |
| 29            | 1             | 0           | -0.771550               | -2.000731 | -0.000391 |
| 30            | 17            | 0           | 3.775120                | 1.283297  | 3.915840  |
| 31            | 6             | 0           | 2.107764                | 1.890198  | -1.961289 |
| 32            | 1             | 0           | 3.070313                | 1.922468  | -2.448252 |
| 33            | 6             | 0           | -0.262040               | 1.307056  | -2.105881 |
| 34            | 6             | 0           | 0.973219                | 1.449275  | -2.738354 |
| 35            | 6             | 0           | 1.073540                | 1.247471  | -4.108467 |
| 36            | 1             | 0           | 2.033558                | 1.356547  | -4.587827 |
| 37            | 6             | 0           | -0.043797               | 0.936131  | -4.852092 |
| 38            | 1             | 0           | 0.038881                | 0.789309  | -5.916071 |
| 39            | 6             | 0           | -1.378115               | 1.011046  | -2.862478 |
| 40            | 1             | 0           | -2.338054               | 0.920969  | -2.378367 |
| 41            | 6             | 0           | -1.273735               | 0.831917  | -4.229406 |
| 42            | 1             | 0           | -2.155092               | 0.611213  | -4.808786 |
| 43            | 1             | 0           | 2.807116                | 2.794723  | -0.183448 |
| 44            | 16            | 0           | 0.372259                | 3.350873  | 1.189959  |

Compound 25

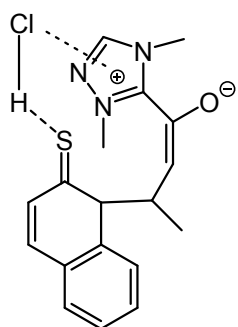

E=-1795,665993

| Center Number | Atomic Number | Atomic Type | Coordinates (Angstroms) |           |           |
|---------------|---------------|-------------|-------------------------|-----------|-----------|
|               |               |             | X                       | Y         | Z         |
| 1             | 6             | 0           | 0.000000                | 0.000000  | 0.000000  |
| 2             | 6             | 0           | 0.000000                | 0.000000  | 1.471572  |
| 3             | 6             | 0           | 1.222237                | 0.000000  | 2.077885  |
| 4             | 6             | 0           | 1.272890                | -0.057420 | 3.560959  |
| 5             | 7             | 0           | 0.468466                | 0.442249  | 4.485145  |
| 6             | 7             | 0           | 2.273805                | -0.633346 | 4.239681  |
| 7             | 7             | 0           | 0.911476                | 0.195606  | 5.727565  |
| 8             | 6             | 0           | -0.728811               | 1.228679  | 4.314898  |
| 9             | 6             | 0           | 2.006882                | -0.455769 | 5.551312  |
| 10            | 6             | 0           | 3.430455                | -1.318734 | 3.693940  |
| 11            | 6             | 0           | -1.319517               | -0.401760 | -0.614246 |
| 12            | 6             | 0           | 0.567928                | 1.396941  | -0.578581 |
| 13            | 6             | 0           | -0.506540               | 2.400902  | -0.515498 |
| 14            | 16            | 0           | -0.924209               | 3.144536  | 0.901049  |
| 15            | 6             | 0           | -1.244727               | 2.675040  | -1.705138 |
| 16            | 1             | 0           | -0.921352               | -0.045890 | 2.024248  |
| 17            | 8             | 0           | 2.345622                | 0.024519  | 1.516209  |
| 18            | 1             | 0           | -0.738317               | 1.976845  | 5.094959  |
| 19            | 1             | 0           | -1.604034               | 0.594332  | 4.397759  |
| 20            | 1             | 0           | -0.700297               | 1.692383  | 3.338399  |
| 21            | 1             | 0           | 2.639096                | -0.816445 | 6.337630  |
| 22            | 1             | 0           | 3.980800                | -1.737891 | 4.526309  |
| 23            | 1             | 0           | 4.029076                | -0.616498 | 3.134998  |
| 24            | 1             | 0           | 3.105475                | -2.106116 | 3.028495  |
| 25            | 1             | 0           | 0.854062                | 3.172379  | 2.041307  |
| 26            | 1             | 0           | -2.127541               | 0.241561  | -0.273380 |
| 27            | 1             | 0           | -1.560057               | -1.420821 | -0.324865 |
| 28            | 1             | 0           | -1.285647               | -0.359669 | -1.699526 |
| 29            | 1             | 0           | 1.379350                | 1.624789  | 0.109242  |
| 30            | 17            | 0           | 1.905604                | 3.352394  | 2.832033  |
| 31            | 6             | 0           | -0.801854               | 2.266972  | -2.909051 |
| 32            | 1             | 0           | -1.355353               | 2.533946  | -3.796900 |
| 33            | 6             | 0           | 1.117251                | 1.142060  | -1.934297 |
| 34            | 6             | 0           | 0.416581                | 1.528059  | -3.074275 |
| 35            | 1             | 0           | -2.128404               | 3.284755  | -1.619010 |
| 36            | 6             | 0           | 2.311721                | 0.454523  | -2.068870 |
| 37            | 1             | 0           | 2.836159                | 0.157871  | -1.172285 |
| 38            | 6             | 0           | 0.920006                | 1.217741  | -4.336024 |
| 39            | 1             | 0           | 0.369112                | 1.520726  | -5.212688 |
| 40            | 6             | 0           | 2.108260                | 0.539173  | -4.459543 |
| 41            | 1             | 0           | 2.498475                | 0.304397  | -5.435923 |
| 42            | 6             | 0           | 2.806213                | 0.160341  | -3.321593 |
| 43            | 1             | 0           | 3.741997                | -0.365918 | -3.417525 |
| 44            | 1             | 0           | 0.779189                | -0.687694 | -0.325838 |

Compound TS1

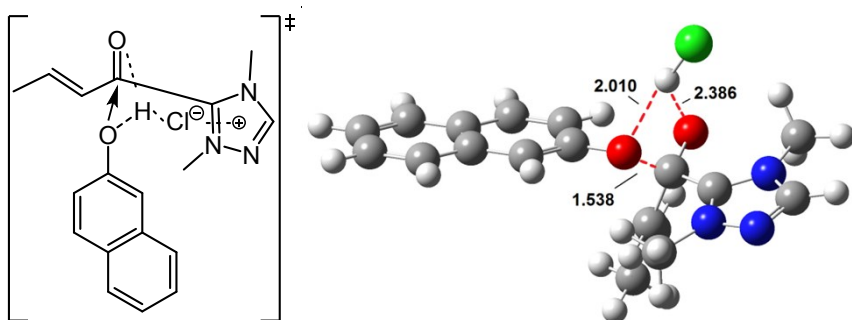

E=-1472,623304; 1 imaginary frequencies= -261.3459

| Center Number | Atomic Number | Atomic Type | Coordinates (Angstroms) |           |           |
|---------------|---------------|-------------|-------------------------|-----------|-----------|
|               |               |             | X                       | Y         | Z         |
| 1             | 6             | 0           | 0.000000                | 0.000000  | 0.000000  |
| 2             | 6             | 0           | 0.000000                | 0.000000  | 1.319110  |
| 3             | 6             | 0           | 1.307019                | 0.000000  | 2.079629  |
| 4             | 8             | 0           | 1.183077                | 1.110930  | 3.135777  |
| 5             | 8             | 0           | 2.385265                | 0.053309  | 1.421959  |
| 6             | 6             | 0           | 1.299127                | -1.204283 | 3.056188  |
| 7             | 6             | 0           | 0.847632                | 2.348880  | 2.703379  |
| 8             | 7             | 0           | 2.187031                | -2.201373 | 3.010366  |
| 9             | 7             | 0           | 0.474010                | -1.513787 | 4.038716  |
| 10            | 6             | 0           | 0.090225                | 3.137279  | 3.519653  |
| 11            | 6             | 0           | 1.293953                | 2.843369  | 1.459208  |
| 12            | 6             | 0           | 1.842531                | -3.068802 | 3.988029  |
| 13            | 6             | 0           | 3.324921                | -2.379701 | 2.120030  |
| 14            | 7             | 0           | 0.798370                | -2.673347 | 4.628356  |
| 15            | 6             | 0           | -0.693746               | -0.801090 | 4.501659  |
| 16            | 6             | 0           | -1.203758               | 0.036670  | -0.864742 |
| 17            | 1             | 0           | 0.972863                | -0.012397 | -0.474044 |
| 18            | 1             | 0           | -0.925382               | 0.029177  | 1.879584  |
| 19            | 1             | 0           | 3.141549                | 0.882748  | 3.527059  |
| 20            | 1             | 0           | -0.229776               | 2.756205  | 4.476772  |
| 21            | 1             | 0           | 2.385001                | -3.969027 | 4.196208  |
| 22            | 1             | 0           | 2.988320                | -2.358735 | 1.095267  |
| 23            | 1             | 0           | 4.031541                | -1.578746 | 2.270264  |
| 24            | 1             | 0           | 3.763729                | -3.339276 | 2.362305  |
| 25            | 1             | 0           | -0.597666               | 0.235370  | 4.218242  |
| 26            | 1             | 0           | -1.583476               | -1.242121 | 4.067582  |
| 27            | 1             | 0           | -0.726393               | -0.894639 | 5.578226  |
| 28            | 1             | 0           | -2.120092               | 0.038172  | -0.283342 |
| 29            | 1             | 0           | -1.195083               | 0.927303  | -1.489821 |
| 30            | 1             | 0           | -1.223291               | -0.816450 | -1.539960 |
| 31            | 17            | 0           | 4.152553                | 0.605700  | 4.290234  |
| 32            | 6             | 0           | 0.950460                | 4.098166  | 1.069127  |
| 33            | 1             | 0           | 1.291475                | 4.475140  | 0.117311  |
| 34            | 6             | 0           | -0.264590               | 4.443651  | 3.136574  |
| 35            | 6             | 0           | 0.163729                | 4.934516  | 1.884565  |
| 36            | 6             | 0           | -0.200157               | 6.236753  | 1.495803  |
| 37            | 1             | 0           | 0.134286                | 6.603102  | 0.537535  |
| 38            | 6             | 0           | -0.958985               | 7.021636  | 2.308880  |
| 39            | 1             | 0           | -1.232849               | 8.017558  | 2.001470  |
| 40            | 6             | 0           | -1.046281               | 5.279918  | 3.958281  |
| 41            | 1             | 0           | -1.373016               | 4.907757  | 4.916813  |
| 42            | 6             | 0           | -1.385839               | 6.534939  | 3.554522  |
| 43            | 1             | 0           | -1.984882               | 7.162559  | 4.194336  |
| 44            | 1             | 0           | 1.908470                | 2.205166  | 0.849625  |

Compound TS2

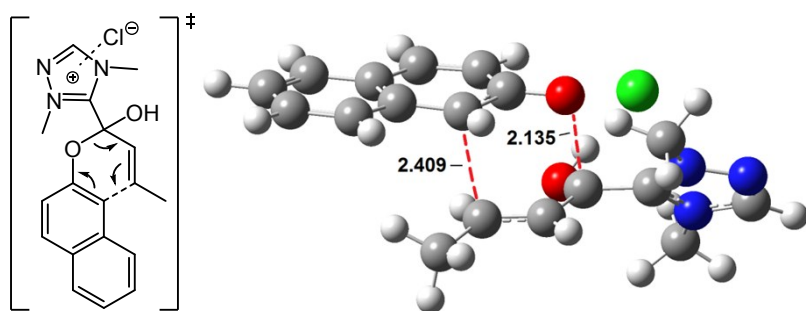

E=-1472,625461; 1 imaginary frequencies= -293.9134

| Center Number | Atomic Number | Atomic Type | Coordinates (Angstroms) |           |           |
|---------------|---------------|-------------|-------------------------|-----------|-----------|
|               |               |             | X                       | Y         | Z         |
| 1             | 6             | 0           | 0.000000                | 0.000000  | 0.000000  |
| 2             | 6             | 0           | 0.000000                | 0.000000  | 1.368498  |
| 3             | 6             | 0           | 1.210378                | 0.000000  | 2.049094  |
| 4             | 8             | 0           | 1.538363                | 2.093649  | 1.786777  |
| 5             | 8             | 0           | 2.291699                | -0.422358 | 1.456002  |
| 6             | 6             | 0           | 1.217346                | 0.008218  | 3.518626  |
| 7             | 6             | 0           | 1.644653                | 2.176500  | 0.529798  |
| 8             | 7             | 0           | 1.812521                | -0.916401 | 4.281055  |
| 9             | 7             | 0           | 0.594680                | 0.821216  | 4.350838  |
| 10            | 6             | 0           | 0.509247                | 2.337213  | -0.286918 |
| 11            | 6             | 0           | 2.911460                | 1.994458  | -0.122573 |
| 12            | 6             | 0           | 1.536527                | -0.584218 | 5.558107  |
| 13            | 6             | 0           | 2.572873                | -2.081293 | 3.858845  |
| 14            | 7             | 0           | 0.790880                | 0.463995  | 5.623144  |
| 15            | 6             | 0           | -0.255529               | 1.958749  | 4.072307  |
| 16            | 6             | 0           | -1.240504               | -0.092052 | -0.802288 |
| 17            | 1             | 0           | 0.930442                | -0.232669 | -0.495680 |
| 18            | 1             | 0           | -0.909496               | 0.160911  | 1.924088  |
| 19            | 1             | 0           | 3.129142                | -0.099455 | 1.927328  |
| 20            | 1             | 0           | -0.427840               | 2.573753  | 0.191328  |
| 21            | 1             | 0           | 1.898371                | -1.134898 | 6.402888  |
| 22            | 1             | 0           | 2.074143                | -2.547153 | 3.020486  |
| 23            | 1             | 0           | 3.572169                | -1.769668 | 3.580764  |
| 24            | 1             | 0           | 2.601935                | -2.767990 | 4.693403  |
| 25            | 1             | 0           | -0.048199               | 2.293583  | 3.067031  |
| 26            | 1             | 0           | -1.290318               | 1.663643  | 4.202729  |
| 27            | 1             | 0           | -0.000717               | 2.730859  | 4.784573  |
| 28            | 1             | 0           | -2.105749               | 0.269991  | -0.255697 |
| 29            | 1             | 0           | -1.151487               | 0.452124  | -1.737110 |
| 30            | 1             | 0           | -1.417075               | -1.135438 | -1.061638 |
| 31            | 17            | 0           | 4.601360                | 0.462891  | 2.952266  |
| 32            | 6             | 0           | 3.018362                | 2.070280  | -1.464026 |
| 33            | 1             | 0           | 3.979949                | 1.948070  | -1.938492 |
| 34            | 6             | 0           | 0.627943                | 2.500233  | -1.687730 |
| 35            | 6             | 0           | 1.889864                | 2.331863  | -2.291846 |
| 36            | 6             | 0           | 2.001952                | 2.457383  | -3.680612 |
| 37            | 1             | 0           | 2.970535                | 2.326835  | -4.137405 |
| 38            | 6             | 0           | 0.908629                | 2.746840  | -4.450498 |
| 39            | 1             | 0           | 1.010171                | 2.842969  | -5.518944 |
| 40            | 6             | 0           | -0.476548               | 2.808538  | -2.496920 |
| 41            | 1             | 0           | -1.437652               | 2.959342  | -2.029860 |
| 42            | 6             | 0           | -0.340237               | 2.929127  | -3.851896 |
| 43            | 1             | 0           | -1.195991               | 3.170976  | -4.460810 |
| 44            | 1             | 0           | 3.766757                | 1.824081  | 0.510817  |

Compound TS3

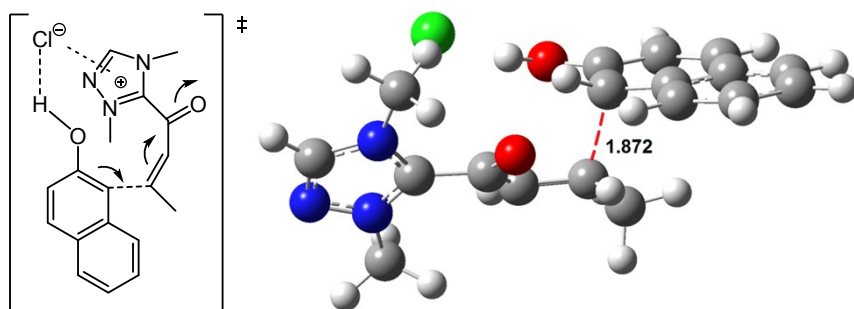

E=-1472,644413; 1 imaginary frequencies= -350.2907

| Center Number | Atomic Number | Atomic Type | Coordinates (Angstroms) |           |           |
|---------------|---------------|-------------|-------------------------|-----------|-----------|
|               |               |             | X                       | Y         | Z         |
| 1             | 6             | 0           | 0.000000                | 0.000000  | 0.000000  |
| 2             | 6             | 0           | 0.000000                | 0.000000  | 1.420007  |
| 3             | 6             | 0           | 1.237842                | 0.000000  | 2.040688  |
| 4             | 6             | 0           | 1.291788                | 0.053514  | 3.528432  |
| 5             | 7             | 0           | 0.453357                | -0.420652 | 4.432255  |
| 6             | 7             | 0           | 2.312929                | 0.567486  | 4.218275  |
| 7             | 7             | 0           | 0.885735                | -0.197984 | 5.680138  |
| 8             | 6             | 0           | -0.801722               | -1.109285 | 4.246185  |
| 9             | 6             | 0           | 2.011521                | 0.408220  | 5.522009  |
| 10            | 6             | 0           | 3.478125                | 1.261122  | 3.698987  |
| 11            | 6             | 0           | -1.279921               | -0.295313 | -0.715206 |
| 12            | 6             | 0           | 0.668192                | 1.658546  | -0.552738 |
| 13            | 6             | 0           | -0.499483               | 2.460219  | -0.532296 |
| 14            | 8             | 0           | -1.059077               | 2.835003  | 0.568522  |
| 15            | 6             | 0           | -1.165229               | 2.777592  | -1.737755 |
| 16            | 1             | 0           | -0.904855               | 0.187875  | 1.970332  |
| 17            | 8             | 0           | 2.340560                | 0.002158  | 1.475413  |
| 18            | 1             | 0           | -0.948381               | -1.735074 | 5.114654  |
| 19            | 1             | 0           | -0.749499               | -1.706892 | 3.346874  |
| 20            | 1             | 0           | -1.609168               | -0.391006 | 4.168254  |
| 21            | 1             | 0           | 2.640902                | 0.747573  | 6.319586  |
| 22            | 1             | 0           | 4.020144                | 1.656118  | 4.548005  |
| 23            | 1             | 0           | 3.137229                | 2.069039  | 3.065698  |
| 24            | 1             | 0           | 4.086676                | 0.571945  | 3.134225  |
| 25            | 1             | 0           | -0.445731               | 2.825355  | 1.364793  |
| 26            | 1             | 0           | -2.098229               | 0.306544  | -0.329970 |
| 27            | 1             | 0           | -1.529646               | -1.341841 | -0.558631 |
| 28            | 1             | 0           | -1.192211               | -0.131174 | -1.784608 |
| 29            | 1             | 0           | 1.354737                | 1.778182  | 0.276660  |
| 30            | 17            | 0           | 0.691028                | 3.155214  | 2.860657  |
| 31            | 6             | 0           | -0.611358               | 2.448014  | -2.926694 |
| 32            | 1             | 0           | -1.116394               | 2.718753  | -3.841302 |
| 33            | 6             | 0           | 1.295764                | 1.423234  | -1.837328 |
| 34            | 6             | 0           | 0.635550                | 1.767235  | -3.021760 |
| 35            | 1             | 0           | -2.091990               | 3.321404  | -1.673056 |
| 36            | 6             | 0           | 2.529625                | 0.781564  | -1.903416 |
| 37            | 1             | 0           | 3.014884                | 0.505457  | -0.979638 |
| 38            | 6             | 0           | 1.226084                | 1.468515  | -4.254353 |
| 39            | 1             | 0           | 0.711349                | 1.739971  | -5.162497 |
| 40            | 6             | 0           | 2.442305                | 0.842718  | -4.304150 |
| 41            | 1             | 0           | 2.895812                | 0.615337  | -5.254411 |
| 42            | 6             | 0           | 3.095496                | 0.500048  | -3.121279 |
| 43            | 1             | 0           | 4.053931                | 0.008949  | -3.164871 |
| 44            | 1             | 0           | 0.852119                | -0.533460 | -0.401742 |

Compound TS4

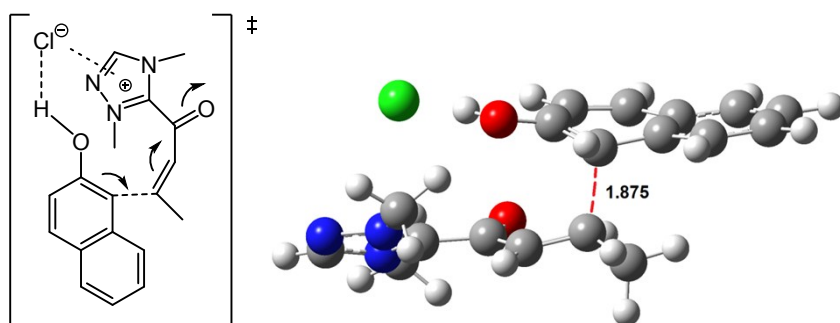

E=-1472.640764; 1 imaginary frequencies= -362.7169

| Center Number | Atomic Number | Atomic Type | Coordinates (Angstroms) |           |           |
|---------------|---------------|-------------|-------------------------|-----------|-----------|
|               |               |             | X                       | Y         | Z         |
| 1             | 6             | 0           | 0.000000                | 0.000000  | 0.000000  |
| 2             | 6             | 0           | 0.000000                | 0.000000  | 1.421001  |
| 3             | 6             | 0           | 1.230018                | 0.000000  | 2.055712  |
| 4             | 6             | 0           | 1.295326                | -0.233611 | 3.526040  |
| 5             | 7             | 0           | 0.504045                | -0.942324 | 4.311960  |
| 6             | 7             | 0           | 2.292378                | 0.190752  | 4.304034  |
| 7             | 7             | 0           | 0.964367                | -0.989174 | 5.567358  |
| 8             | 6             | 0           | -0.657442               | -1.731943 | 3.970998  |
| 9             | 6             | 0           | 2.054056                | -0.304142 | 5.534845  |
| 10            | 6             | 0           | 3.505635                | 0.870378  | 3.893812  |
| 11            | 6             | 0           | -1.278738               | 0.433116  | -0.656210 |
| 12            | 6             | 0           | 0.296619                | -1.732490 | -0.652424 |
| 13            | 6             | 0           | 1.427493                | -2.122562 | 0.121856  |
| 14            | 8             | 0           | 1.181214                | -2.585942 | 1.294943  |
| 15            | 6             | 0           | 2.735919                | -1.907038 | -0.367854 |
| 16            | 1             | 0           | 0.894560                | 0.446493  | -0.419930 |
| 17            | 1             | 0           | -0.923297               | -0.093079 | 1.964699  |
| 18            | 8             | 0           | 2.325452                | 0.123658  | 1.493297  |
| 19            | 1             | 0           | -0.737806               | -2.497486 | 4.728738  |
| 20            | 1             | 0           | -0.500620               | -2.177723 | 2.997883  |
| 21            | 1             | 0           | -1.549098               | -1.116095 | 3.972490  |
| 22            | 1             | 0           | 2.700524                | -0.141352 | 6.373122  |
| 23            | 1             | 0           | 4.129143                | 0.158718  | 3.369094  |
| 24            | 1             | 0           | 3.993636                | 1.232990  | 4.789017  |
| 25            | 1             | 0           | 3.261857                | 1.692211  | 3.237803  |
| 26            | 1             | 0           | 1.997781                | -2.677962 | 1.895902  |
| 27            | 1             | 0           | -2.120936               | -0.165263 | -0.317421 |
| 28            | 1             | 0           | -1.227376               | 0.389257  | -1.736266 |
| 29            | 1             | 0           | -1.472700               | 1.464953  | -0.375608 |
| 30            | 1             | 0           | -0.629299               | -2.194937 | -0.342125 |
| 31            | 17            | 0           | 3.326891                | -2.781777 | 3.202766  |
| 32            | 6             | 0           | 2.899166                | -1.546240 | -1.658181 |
| 33            | 1             | 0           | 3.894405                | -1.385479 | -2.041975 |
| 34            | 6             | 0           | 0.501983                | -1.615848 | -2.084859 |
| 35            | 6             | 0           | 1.804290                | -1.435621 | -2.567887 |
| 36            | 1             | 0           | 3.564241                | -2.050342 | 0.304462  |
| 37            | 6             | 0           | -0.555491               | -1.654261 | -2.989764 |
| 38            | 1             | 0           | -1.554702               | -1.831646 | -2.624381 |
| 39            | 6             | 0           | 2.009918                | -1.238564 | -3.936220 |
| 40            | 1             | 0           | 3.015481                | -1.089935 | -4.296820 |
| 41            | 6             | 0           | 0.954826                | -1.257095 | -4.809340 |
| 42            | 1             | 0           | 1.122012                | -1.113979 | -5.863882 |
| 43            | 6             | 0           | -0.333265               | -1.483263 | -4.333519 |
| 44            | 1             | 0           | -1.160119               | -1.527436 | -5.023109 |

Compound TS5

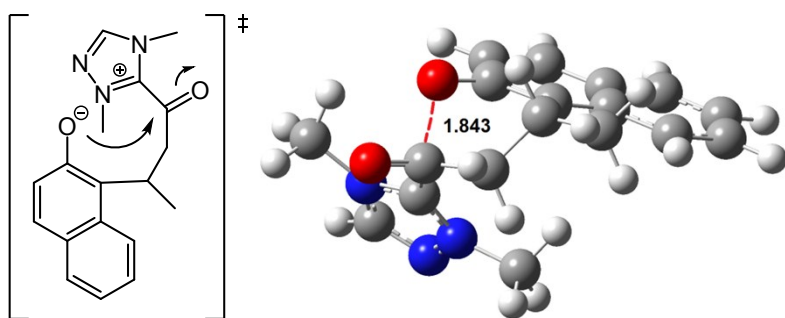

E=-1011,754778; 1 imaginary frequencies= -100.2999

| Center Number | Atomic Number | Atomic Type | Coordinates (Angstroms) |           |           |
|---------------|---------------|-------------|-------------------------|-----------|-----------|
|               |               |             | X                       | Y         | Z         |
| 1             | 6             | 0           | 0.000000                | 0.000000  | 0.000000  |
| 2             | 6             | 0           | 0.000000                | 0.000000  | 1.510984  |
| 3             | 6             | 0           | 1.364874                | 0.000000  | 2.201742  |
| 4             | 6             | 0           | 1.158538                | 0.039114  | 3.701121  |
| 5             | 6             | 0           | 2.299621                | -1.004263 | 1.571521  |
| 6             | 6             | 0           | 0.066288                | -1.329447 | -0.744577 |
| 7             | 7             | 0           | -0.086688               | -2.590459 | -0.380657 |
| 8             | 7             | 0           | 0.218186                | -1.357299 | -2.071380 |
| 9             | 7             | 0           | -0.031206               | -3.425664 | -1.433203 |
| 10            | 6             | 0           | -0.307235               | -3.172597 | 0.926949  |
| 11            | 6             | 0           | 0.157722                | -2.651753 | -2.443542 |
| 12            | 6             | 0           | 0.432244                | -0.222108 | -2.951256 |
| 13            | 6             | 0           | 2.501107                | -0.697123 | 0.231977  |
| 14            | 6             | 0           | 2.989087                | -2.107209 | 2.141178  |
| 15            | 6             | 0           | 3.410012                | -1.439896 | -0.554711 |
| 16            | 6             | 0           | 4.101444                | -2.468874 | -0.011741 |
| 17            | 6             | 0           | 3.902879                | -2.838316 | 1.332340  |
| 18            | 6             | 0           | 2.816660                | -2.572116 | 3.467870  |
| 19            | 6             | 0           | 4.603368                | -3.934434 | 1.866408  |
| 20            | 6             | 0           | 3.504358                | -3.644541 | 3.952504  |
| 21            | 6             | 0           | 4.418781                | -4.338677 | 3.151582  |
| 22            | 1             | 0           | 1.800659                | 0.959100  | 1.920084  |
| 23            | 8             | 0           | -0.643710               | 0.838929  | -0.618565 |
| 24            | 1             | 0           | -0.255013               | -4.242151 | 0.787450  |
| 25            | 1             | 0           | -1.287418               | -2.900235 | 1.297707  |
| 26            | 1             | 0           | 0.469525                | -2.854617 | 1.608527  |
| 27            | 1             | 0           | 0.259594                | -2.982774 | -3.457460 |
| 28            | 1             | 0           | 0.880456                | -0.596172 | -3.862939 |
| 29            | 1             | 0           | 1.093350                | 0.466697  | -2.446282 |
| 30            | 1             | 0           | -0.511880               | 0.263204  | -3.153159 |
| 31            | 1             | 0           | 0.575189                | -0.802936 | 4.065601  |
| 32            | 1             | 0           | 0.604186                | 0.940291  | 3.951075  |
| 33            | 1             | 0           | 2.099143                | 0.071468  | 4.241180  |
| 34            | 8             | 0           | 1.799823                | 0.262243  | -0.315765 |
| 35            | 1             | 0           | 3.541640                | -1.146868 | -1.584432 |
| 36            | 1             | 0           | 4.806020                | -3.033459 | -0.603050 |
| 37            | 1             | 0           | 2.124976                | -2.078327 | 4.120328  |
| 38            | 1             | 0           | 5.295100                | -4.456060 | 1.222587  |
| 39            | 1             | 0           | 4.960602                | -5.181269 | 3.548186  |
| 40            | 1             | 0           | 3.338713                | -3.960395 | 4.970223  |
| 41            | 1             | 0           | -0.608178               | -0.821624 | 1.882622  |
| 42            | 1             | 0           | -0.526222               | 0.913776  | 1.770732  |

Compound TS6

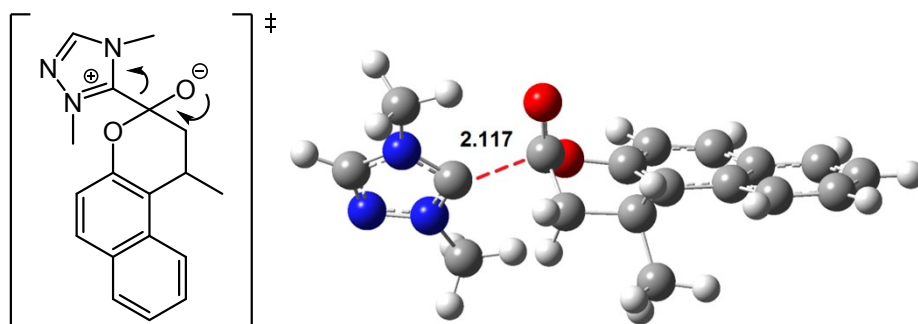

E=-1011,752008; 1 imaginary frequencies= -166.1919

| Center Number | Atomic Number | Atomic Type | Coordinates (Angstroms) |           |           |
|---------------|---------------|-------------|-------------------------|-----------|-----------|
|               |               |             | X                       | Y         | Z         |
| 1             | 6             | 0           | 0.000000                | 0.000000  | 0.000000  |
| 2             | 6             | 0           | 0.000000                | 0.000000  | 1.493236  |
| 3             | 6             | 0           | 1.443694                | 0.000000  | 1.998123  |
| 4             | 6             | 0           | 1.423928                | -0.532544 | 3.426564  |
| 5             | 6             | 0           | 2.327775                | -0.818461 | 1.093585  |
| 6             | 6             | 0           | -1.973445               | -0.681508 | -0.352379 |
| 7             | 7             | 0           | -2.521125               | -1.889378 | -0.331672 |
| 8             | 7             | 0           | -2.921511               | 0.057378  | -0.959863 |
| 9             | 7             | 0           | -3.750776               | -1.955206 | -0.886874 |
| 10            | 6             | 0           | -1.943321               | -3.088651 | 0.213218  |
| 11            | 6             | 0           | -3.970436               | -0.746390 | -1.263713 |
| 12            | 6             | 0           | -2.840802               | 1.476822  | -1.224467 |
| 13            | 6             | 0           | 1.813810                | -1.436322 | -0.015858 |
| 14            | 6             | 0           | 3.717552                | -0.968341 | 1.352134  |
| 15            | 6             | 0           | 2.576340                | -2.332580 | -0.786014 |
| 16            | 6             | 0           | 3.871642                | -2.568529 | -0.473062 |
| 17            | 6             | 0           | 4.488249                | -1.870548 | 0.584434  |
| 18            | 6             | 0           | 4.390705                | -0.201900 | 2.326437  |
| 19            | 6             | 0           | 5.857484                | -2.029887 | 0.859856  |
| 20            | 6             | 0           | 5.724584                | -0.359472 | 2.557039  |
| 21            | 6             | 0           | 6.468649                | -1.298752 | 1.831823  |
| 22            | 1             | 0           | 1.808188                | 1.027544  | 2.002439  |
| 23            | 8             | 0           | 0.158864                | 0.977588  | -0.685497 |
| 24            | 1             | 0           | -1.944732               | -3.862929 | -0.544103 |
| 25            | 1             | 0           | -2.519854               | -3.420380 | 1.069180  |
| 26            | 1             | 0           | -0.926618               | -2.866605 | 0.501412  |
| 27            | 1             | 0           | -4.861683               | -0.411779 | -1.756940 |
| 28            | 1             | 0           | -3.089189               | 1.668970  | -2.261438 |
| 29            | 1             | 0           | -1.825420               | 1.792463  | -1.033362 |
| 30            | 1             | 0           | -3.527529               | 2.015303  | -0.581055 |
| 31            | 1             | 0           | 1.051153                | -1.553806 | 3.430212  |
| 32            | 1             | 0           | 0.756787                | 0.070367  | 4.037924  |
| 33            | 1             | 0           | 2.399791                | -0.538905 | 3.895672  |
| 34            | 8             | 0           | 0.546229                | -1.235600 | -0.453876 |
| 35            | 1             | 0           | 2.096372                | -2.807181 | -1.625344 |
| 36            | 1             | 0           | 4.457113                | -3.263441 | -1.053941 |
| 37            | 1             | 0           | 3.850104                | 0.549370  | 2.875719  |
| 38            | 1             | 0           | 6.420760                | -2.736048 | 0.269685  |
| 39            | 1             | 0           | 7.520454                | -1.423282 | 2.029693  |
| 40            | 1             | 0           | 6.213447                | 0.251783  | 3.298274  |
| 41            | 1             | 0           | -0.500762               | -0.897725 | 1.844442  |
| 42            | 1             | 0           | -0.539624               | 0.863634  | 1.864493  |



Compound TS7

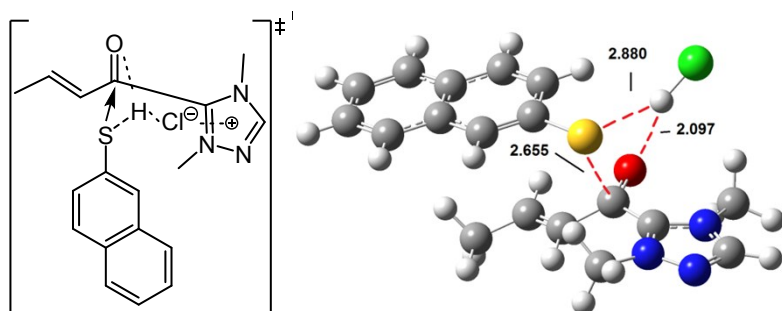

E=-1795,665399; 1 imaginary frequencies= -321.6409

| Center Number | Atomic Number | Atomic Type | Coordinates (Angstroms) |           |           |
|---------------|---------------|-------------|-------------------------|-----------|-----------|
|               |               |             | X                       | Y         | Z         |
| 1             | 6             | 0           | 0.000000                | 0.000000  | 0.000000  |
| 2             | 6             | 0           | 0.000000                | 0.000000  | 1.330535  |
| 3             | 6             | 0           | 1.258535                | 0.000000  | 2.055986  |
| 4             | 16            | 0           | 1.264978                | 2.607060  | 2.559145  |
| 5             | 8             | 0           | 2.353734                | -0.136031 | 1.527090  |
| 6             | 6             | 0           | 1.195514                | -0.245417 | 3.532082  |
| 7             | 6             | 0           | 1.099941                | 2.866356  | 0.851023  |
| 8             | 7             | 0           | 2.145815                | -0.925823 | 4.190405  |
| 9             | 7             | 0           | 0.259572                | 0.013777  | 4.435125  |
| 10            | 6             | 0           | -0.098467               | 3.243764  | 0.291029  |
| 11            | 6             | 0           | 2.194590                | 2.640913  | -0.019775 |
| 12            | 6             | 0           | 1.735453                | -1.013962 | 5.474178  |
| 13            | 6             | 0           | 3.363852                | -1.536758 | 3.680855  |
| 14            | 7             | 0           | 0.592244                | -0.450745 | 5.645189  |
| 15            | 6             | 0           | -0.983678               | 0.736663  | 4.292887  |
| 16            | 6             | 0           | -1.204782               | -0.027954 | -0.854039 |
| 17            | 1             | 0           | 0.962610                | 0.019320  | -0.491928 |
| 18            | 1             | 0           | -0.926394               | -0.006296 | 1.878934  |
| 19            | 1             | 0           | 3.779280                | 1.253228  | 2.186384  |
| 20            | 1             | 0           | -0.945334               | 3.424215  | 0.934535  |
| 21            | 1             | 0           | 2.302228                | -1.498901 | 6.243197  |
| 22            | 1             | 0           | 3.146181                | -2.082688 | 2.775756  |
| 23            | 1             | 0           | 4.104607                | -0.779545 | 3.472371  |
| 24            | 1             | 0           | 3.723801                | -2.209882 | 4.447611  |
| 25            | 1             | 0           | -0.830809               | 1.530882  | 3.571853  |
| 26            | 1             | 0           | -1.772861               | 0.060799  | 3.984186  |
| 27            | 1             | 0           | -1.214331               | 1.149726  | 5.264140  |
| 28            | 1             | 0           | -2.119915               | -0.024990 | -0.271045 |
| 29            | 1             | 0           | -1.210696               | 0.833194  | -1.519608 |
| 30            | 1             | 0           | -1.197760               | -0.911927 | -1.489348 |
| 31            | 17            | 0           | 5.014544                | 1.534897  | 2.449681  |
| 32            | 6             | 0           | 2.068287                | 2.773575  | -1.366623 |
| 33            | 1             | 0           | 2.916597                | 2.594310  | -2.009257 |
| 34            | 6             | 0           | -0.253977               | 3.404032  | -1.094647 |
| 35            | 6             | 0           | 0.843772                | 3.152252  | -1.948599 |
| 36            | 6             | 0           | 0.678155                | 3.291105  | -3.338836 |
| 37            | 1             | 0           | 1.523343                | 3.101274  | -3.982356 |
| 38            | 6             | 0           | -0.522469               | 3.657540  | -3.866029 |
| 39            | 1             | 0           | -0.638119               | 3.760411  | -4.932619 |
| 40            | 6             | 0           | -1.484818               | 3.784113  | -1.670879 |
| 41            | 1             | 0           | -2.322772               | 3.978856  | -1.019497 |
| 42            | 6             | 0           | -1.616437               | 3.906203  | -3.019959 |
| 43            | 1             | 0           | -2.562761               | 4.198491  | -3.445655 |
| 44            | 1             | 0           | 3.144033                | 2.365152  | 0.403156  |

Compound TS8

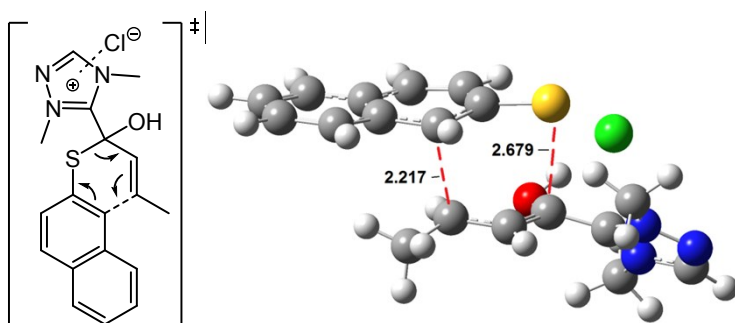

E=-1795,666118; 1 imaginary frequencies= -346.2935

| Center Number | Atomic Number | Atomic Type | Coordinates (Angstroms) |           |           |
|---------------|---------------|-------------|-------------------------|-----------|-----------|
|               |               |             | X                       | Y         | Z         |
| 1             | 6             | 0           | 0.000000                | 0.000000  | 0.000000  |
| 2             | 6             | 0           | 0.000000                | 0.000000  | 1.386745  |
| 3             | 6             | 0           | 1.186007                | 0.000000  | 2.087493  |
| 4             | 8             | 0           | 2.308354                | -0.274816 | 1.467554  |
| 5             | 6             | 0           | 1.180501                | -0.184374 | 3.542904  |
| 6             | 6             | 0           | 1.466226                | 2.314484  | 0.246185  |
| 7             | 7             | 0           | 1.924032                | -1.089095 | 4.194191  |
| 8             | 7             | 0           | 0.428815                | 0.393842  | 4.465381  |
| 9             | 6             | 0           | 0.308846                | 2.128774  | -0.537553 |
| 10            | 6             | 0           | 2.732342                | 2.069587  | -0.365974 |
| 11            | 6             | 0           | 1.593931                | -0.980751 | 5.497847  |
| 12            | 6             | 0           | 2.848333                | -2.073436 | 3.651369  |
| 13            | 7             | 0           | 0.683048                | -0.091130 | 5.684820  |
| 14            | 6             | 0           | -0.599255               | 1.399035  | 4.323910  |
| 15            | 6             | 0           | -1.251037               | -0.324669 | -0.735144 |
| 16            | 1             | 0           | 0.935185                | -0.252172 | -0.478598 |
| 17            | 1             | 0           | -0.929019               | 0.059180  | 1.929824  |
| 18            | 1             | 0           | 3.121695                | 0.100599  | 1.942082  |
| 19            | 1             | 0           | -0.634470               | 2.432703  | -0.112714 |
| 20            | 1             | 0           | 2.042145                | -1.573500 | 6.269550  |
| 21            | 1             | 0           | 2.419556                | -2.512426 | 2.762008  |
| 22            | 1             | 0           | 3.789251                | -1.589638 | 3.419190  |
| 23            | 1             | 0           | 2.983747                | -2.834770 | 4.407232  |
| 24            | 1             | 0           | -0.485830               | 1.884238  | 3.364006  |
| 25            | 1             | 0           | -1.571146               | 0.926650  | 4.409081  |
| 26            | 1             | 0           | -0.467047               | 2.116260  | 5.121921  |
| 27            | 1             | 0           | -2.121829               | 0.127432  | -0.268762 |
| 28            | 1             | 0           | -1.203595               | -0.019968 | -1.773116 |
| 29            | 1             | 0           | -1.392737               | -1.404535 | -0.725774 |
| 30            | 17            | 0           | 4.603122                | 0.709655  | 2.906914  |
| 31            | 6             | 0           | 2.825337                | 1.827961  | -1.689129 |
| 32            | 1             | 0           | 3.789894                | 1.650985  | -2.138754 |
| 33            | 6             | 0           | 0.414419                | 2.055585  | -1.961700 |
| 34            | 6             | 0           | 1.679974                | 1.855665  | -2.537192 |
| 35            | 6             | 0           | 1.785866                | 1.739705  | -3.926546 |
| 36            | 1             | 0           | 2.758996                | 1.580325  | -4.363537 |
| 37            | 6             | 0           | 0.677840                | 1.844634  | -4.723659 |
| 38            | 1             | 0           | 0.773313                | 1.761883  | -5.793759 |
| 39            | 6             | 0           | -0.702662               | 2.175981  | -2.795068 |
| 40            | 1             | 0           | -1.668363               | 2.361368  | -2.350973 |
| 41            | 6             | 0           | -0.574444               | 2.075302  | -4.154764 |
| 42            | 1             | 0           | -1.440705               | 2.178687  | -4.787217 |
| 43            | 1             | 0           | 3.606528                | 2.100131  | 0.263315  |
| 44            | 16            | 0           | 1.347509                | 2.665731  | 1.878634  |

Compound TS9

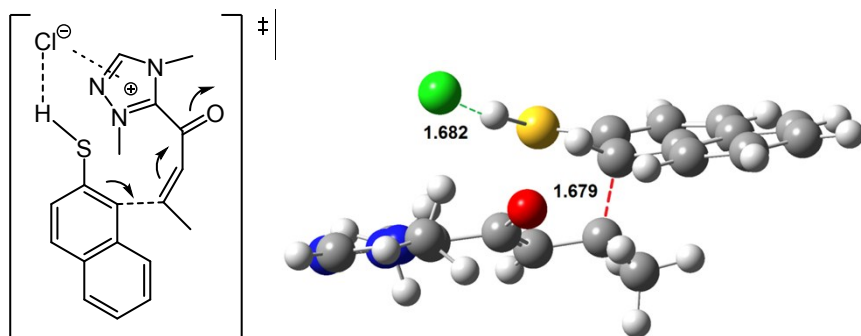

E=-1795,661078; 1 imaginary frequencies= -265.0697

| Center Number | Atomic Number | Atomic Type | Coordinates (Angstroms) |           |           |
|---------------|---------------|-------------|-------------------------|-----------|-----------|
|               |               |             | X                       | Y         | Z         |
| 1             | 6             | 0           | 0.000000                | 0.000000  | 0.000000  |
| 2             | 6             | 0           | 0.000000                | 0.000000  | 1.453338  |
| 3             | 6             | 0           | 1.240283                | 0.000000  | 2.044449  |
| 4             | 6             | 0           | 1.348139                | -0.005718 | 3.526877  |
| 5             | 7             | 0           | 0.484592                | 0.332410  | 4.470516  |
| 6             | 7             | 0           | 2.460825                | -0.366733 | 4.178123  |
| 7             | 7             | 0           | 1.004441                | 0.201311  | 5.698060  |
| 8             | 6             | 0           | -0.842766               | 0.881322  | 4.339239  |
| 9             | 6             | 0           | 2.201935                | -0.221785 | 5.494787  |
| 10            | 6             | 0           | 3.734454                | -0.795663 | 3.627474  |
| 11            | 6             | 0           | -1.301516               | -0.388787 | -0.648728 |
| 12            | 6             | 0           | 0.590246                | 1.467281  | -0.563571 |
| 13            | 6             | 0           | -0.515682               | 2.400505  | -0.500981 |
| 14            | 16            | 0           | -1.058861               | 3.023527  | 0.958895  |
| 15            | 6             | 0           | -1.237994               | 2.706383  | -1.676637 |
| 16            | 1             | 0           | -0.920000               | -0.035306 | 2.003616  |
| 17            | 8             | 0           | 2.331633                | 0.006747  | 1.438505  |
| 18            | 1             | 0           | -1.052457               | 1.406658  | 5.259195  |
| 19            | 1             | 0           | -1.566306               | 0.088032  | 4.190224  |
| 20            | 1             | 0           | -0.852450               | 1.566835  | 3.503062  |
| 21            | 1             | 0           | 2.915796                | -0.435234 | 6.264455  |
| 22            | 1             | 0           | 4.337085                | -1.146940 | 4.455280  |
| 23            | 1             | 0           | 4.207703                | 0.035841  | 3.127596  |
| 24            | 1             | 0           | 3.574553                | -1.586913 | 2.911099  |
| 25            | 1             | 0           | 0.198939                | 2.975751  | 1.813270  |
| 26            | 1             | 0           | -2.126582               | 0.215896  | -0.280198 |
| 27            | 1             | 0           | -1.520090               | -1.427032 | -0.415605 |
| 28            | 1             | 0           | -1.258632               | -0.290466 | -1.729795 |
| 29            | 1             | 0           | 1.374978                | 1.656094  | 0.166271  |
| 30            | 17            | 0           | 1.509914                | 3.158005  | 2.850814  |
| 31            | 6             | 0           | -0.774399               | 2.325408  | -2.888655 |
| 32            | 1             | 0           | -1.324382               | 2.599388  | -3.776116 |
| 33            | 6             | 0           | 1.152972                | 1.232372  | -1.904763 |
| 34            | 6             | 0           | 0.449373                | 1.610273  | -3.048921 |
| 35            | 1             | 0           | -2.131820               | 3.301678  | -1.593764 |
| 36            | 6             | 0           | 2.362022                | 0.565482  | -2.036146 |
| 37            | 1             | 0           | 2.887574                | 0.273163  | -1.139373 |
| 38            | 6             | 0           | 0.966524                | 1.313264  | -4.312133 |
| 39            | 1             | 0           | 0.414450                | 1.609510  | -5.190115 |
| 40            | 6             | 0           | 2.164711                | 0.658052  | -4.429611 |
| 41            | 1             | 0           | 2.565745                | 0.432822  | -5.403687 |
| 42            | 6             | 0           | 2.864432                | 0.286720  | -3.286394 |
| 43            | 1             | 0           | 3.809638                | -0.222458 | -3.381125 |
| 44            | 1             | 0           | 0.811801                | -0.633970 | -0.346893 |

Compound TS10a

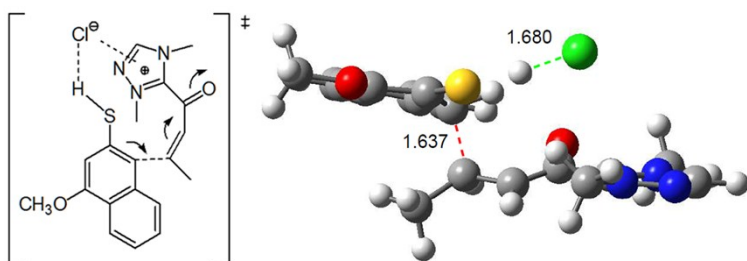

E=-1910.17269066; 1 imaginary frequencies= -599.0150

| Center Number | Atomic Number | Atomic Type | Coordinates (Angstroms) |           |           |
|---------------|---------------|-------------|-------------------------|-----------|-----------|
|               |               |             | X                       | Y         | Z         |
| 1             | 6             | 0           | 0.000000                | 0.000000  | 0.000000  |
| 2             | 6             | 0           | 0.000000                | 0.000000  | 1.465037  |
| 3             | 6             | 0           | 1.233395                | 0.000000  | 2.054481  |
| 4             | 6             | 0           | 1.329931                | 0.026435  | 3.534904  |
| 5             | 7             | 0           | 0.465524                | 0.399655  | 4.465401  |
| 6             | 7             | 0           | 2.432737                | -0.335576 | 4.203976  |
| 7             | 7             | 0           | 0.974086                | 0.286383  | 5.700601  |
| 8             | 6             | 0           | -0.854562               | 0.959241  | 4.312156  |
| 9             | 6             | 0           | 2.166281                | -0.158461 | 5.515294  |
| 10            | 6             | 0           | 3.701921                | -0.797552 | 3.671152  |
| 11            | 6             | 0           | -1.309031               | -0.390307 | -0.637685 |
| 12            | 6             | 0           | 0.584997                | 1.421991  | -0.561459 |
| 13            | 6             | 0           | -0.514442               | 2.381308  | -0.588778 |
| 14            | 16            | 0           | -1.109543               | 3.053861  | 0.837139  |
| 15            | 6             | 0           | -1.168289               | 2.668989  | -1.788097 |
| 16            | 1             | 0           | -0.921709               | -0.030897 | 2.013276  |
| 17            | 8             | 0           | 2.335127                | -0.004868 | 1.455384  |
| 18            | 1             | 0           | -1.054873               | 1.531632  | 5.205920  |
| 19            | 1             | 0           | -1.588670               | 0.168716  | 4.203614  |
| 20            | 1             | 0           | -0.858306               | 1.601961  | 3.442691  |
| 21            | 1             | 0           | 2.871506                | -0.365523 | 6.294639  |
| 22            | 1             | 0           | 4.292815                | -1.143399 | 4.509918  |
| 23            | 1             | 0           | 4.193104                | 0.015010  | 3.157807  |
| 24            | 1             | 0           | 3.532603                | -1.598694 | 2.968106  |
| 25            | 1             | 0           | 0.128099                | 3.015032  | 1.726164  |
| 26            | 1             | 0           | -2.125490               | 0.238267  | -0.289557 |
| 27            | 1             | 0           | -1.544325               | -1.417763 | -0.375756 |
| 28            | 1             | 0           | -1.263424               | -0.324167 | -1.721897 |
| 29            | 1             | 0           | 1.343530                | 1.669719  | 0.178873  |
| 30            | 17            | 0           | 1.432865                | 3.217708  | 2.765117  |
| 31            | 6             | 0           | -0.655951               | 2.240681  | -2.985176 |
| 32            | 6             | 0           | 1.215187                | 1.168296  | -1.873189 |
| 33            | 6             | 0           | 0.584448                | 1.512303  | -3.063146 |
| 34            | 1             | 0           | -2.042013               | 3.294531  | -1.756798 |
| 35            | 6             | 0           | 2.432595                | 0.504672  | -1.918258 |
| 36            | 1             | 0           | 2.898007                | 0.235348  | -0.981805 |
| 37            | 6             | 0           | 1.167530                | 1.192144  | -4.288800 |
| 38            | 1             | 0           | 0.663446                | 1.468414  | -5.198550 |
| 39            | 6             | 0           | 2.373670                | 0.540446  | -4.318566 |
| 40            | 1             | 0           | 2.830300                | 0.295532  | -5.262932 |
| 41            | 6             | 0           | 3.008262                | 0.200531  | -3.129448 |
| 42            | 1             | 0           | 3.959747                | -0.305116 | -3.157214 |

|    |   |   |           |           |           |
|----|---|---|-----------|-----------|-----------|
| 43 | 1 | 0 | 0.788410  | -0.672255 | -0.332419 |
| 44 | 8 | 0 | -1.213733 | 2.491708  | -4.148447 |
| 45 | 6 | 0 | -2.423007 | 3.218834  | -4.200456 |
| 46 | 1 | 0 | -2.282849 | 4.222535  | -3.810796 |
| 47 | 1 | 0 | -2.692200 | 3.267014  | -5.245344 |
| 48 | 1 | 0 | -3.201437 | 2.707360  | -3.642218 |

**Compound TS10b**

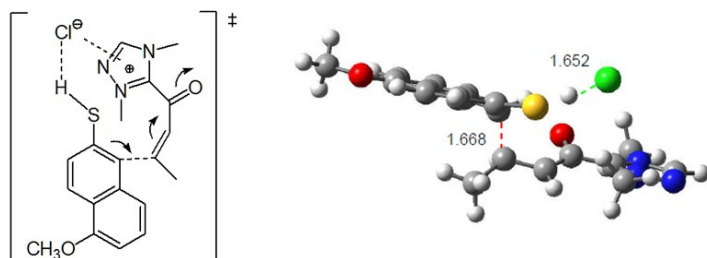

E=- 1910.16358346; 1 imaginary frequencies= - 533.9477

| Center Number | Atomic Number | Atomic Type | Coordinates (Angstroms) |           |           |
|---------------|---------------|-------------|-------------------------|-----------|-----------|
|               |               |             | X                       | Y         | Z         |
| 1             | 6             | 0           | 0.000000                | 0.000000  | 0.000000  |
| 2             | 6             | 0           | 0.000000                | 0.000000  | 1.454305  |
| 3             | 6             | 0           | 1.237711                | 0.000000  | 2.048886  |
| 4             | 6             | 0           | 1.338616                | -0.001034 | 3.531430  |
| 5             | 7             | 0           | 0.471227                | 0.339504  | 4.470745  |
| 6             | 7             | 0           | 2.448791                | -0.359772 | 4.188267  |
| 7             | 7             | 0           | 0.985864                | 0.210773  | 5.700955  |
| 8             | 6             | 0           | -0.857689               | 0.883003  | 4.332742  |
| 9             | 6             | 0           | 2.184776                | -0.211038 | 5.503514  |
| 10            | 6             | 0           | 3.723704                | -0.791243 | 3.642909  |
| 11            | 6             | 0           | -1.301741               | -0.391491 | -0.647158 |
| 12            | 6             | 0           | 0.587090                | 1.468823  | -0.562850 |
| 13            | 6             | 0           | -0.524754               | 2.398030  | -0.513647 |
| 14            | 16            | 0           | -1.078334               | 3.027177  | 0.942397  |
| 15            | 6             | 0           | -1.235874               | 2.690301  | -1.694441 |
| 16            | 1             | 0           | -0.921243               | -0.032350 | 2.002727  |
| 17            | 8             | 0           | 2.333215                | 0.004793  | 1.449242  |
| 18            | 1             | 0           | -1.076212               | 1.402649  | 5.253876  |
| 19            | 1             | 0           | -1.576357               | 0.086955  | 4.174988  |
| 20            | 1             | 0           | -0.865001               | 1.572215  | 3.499504  |
| 21            | 1             | 0           | 2.895868                | -0.421350 | 6.276618  |
| 22            | 1             | 0           | 4.322997                | -1.141786 | 4.473465  |
| 23            | 1             | 0           | 4.199510                | 0.038692  | 3.142907  |
| 24            | 1             | 0           | 3.565342                | -1.583409 | 2.927143  |
| 25            | 1             | 0           | 0.175670                | 2.984509  | 1.802602  |
| 26            | 1             | 0           | -2.127129               | 0.213768  | -0.280407 |
| 27            | 1             | 0           | -1.519303               | -1.429115 | -0.410055 |
| 28            | 1             | 0           | -1.259337               | -0.296443 | -1.728518 |
| 29            | 1             | 0           | 1.366129                | 1.665759  | 0.170570  |
| 30            | 17            | 0           | 1.484757                | 3.171253  | 2.841305  |
| 31            | 6             | 0           | -0.763579               | 2.295096  | -2.902105 |
| 32            | 1             | 0           | -1.303835               | 2.554110  | -3.797331 |
| 33            | 6             | 0           | 1.164914                | 1.224645  | -1.895909 |
| 34            | 6             | 0           | 0.459189                | 1.585051  | -3.042538 |
| 35            | 1             | 0           | -2.130357               | 3.286406  | -1.627495 |
| 36            | 6             | 0           | 2.379792                | 0.564761  | -2.001264 |

|    |   |   |           |           |           |
|----|---|---|-----------|-----------|-----------|
| 37 | 1 | 0 | 2.901315  | 0.288529  | -1.098307 |
| 38 | 6 | 0 | 0.986835  | 1.272124  | -4.311059 |
| 39 | 6 | 0 | 2.196148  | 0.621682  | -4.406487 |
| 40 | 1 | 0 | 2.618062  | 0.379044  | -5.365064 |
| 41 | 6 | 0 | 2.881756  | 0.277442  | -3.247242 |
| 42 | 1 | 0 | 3.830838  | -0.225607 | -3.337869 |
| 43 | 1 | 0 | 0.811759  | -0.633824 | -0.347917 |
| 44 | 8 | 0 | 0.245988  | 1.644908  | -5.360285 |
| 45 | 6 | 0 | 0.726795  | 1.359136  | -6.647554 |
| 46 | 1 | 0 | -0.014431 | 1.738427  | -7.336998 |
| 47 | 1 | 0 | 1.677635  | 1.855006  | -6.829723 |
| 48 | 1 | 0 | 0.842528  | 0.287362  | -6.793505 |

**Compound TS10c**

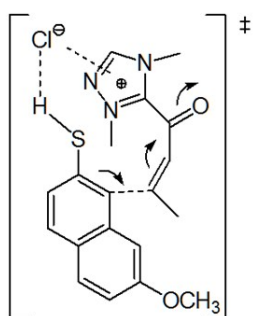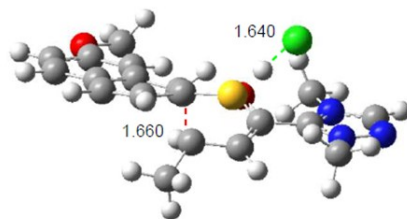

E= -1910.16599479; 1 imaginary frequencies= -529.3366

| Center Number | Atomic Number | Atomic Type | Coordinates (Angstroms) |           |           |
|---------------|---------------|-------------|-------------------------|-----------|-----------|
|               |               |             | X                       | Y         | Z         |
| 1             | 6             | 0           | 0.000000                | 0.000000  | 0.000000  |
| 2             | 6             | 0           | 0.000000                | 0.000000  | 1.458854  |
| 3             | 6             | 0           | 1.234703                | 0.000000  | 2.051733  |
| 4             | 6             | 0           | 1.330349                | 0.020894  | 3.532958  |
| 5             | 7             | 0           | 0.464896                | 0.391490  | 4.463222  |
| 6             | 7             | 0           | 2.433081                | -0.341680 | 4.201532  |
| 7             | 7             | 0           | 0.972732                | 0.275608  | 5.698002  |
| 8             | 6             | 0           | -0.857907               | 0.946696  | 4.312101  |
| 9             | 6             | 0           | 2.165457                | -0.168226 | 5.513079  |
| 10            | 6             | 0           | 3.701973                | -0.804483 | 3.668899  |
| 11            | 6             | 0           | -1.302142               | -0.399947 | -0.643439 |
| 12            | 6             | 0           | 0.580345                | 1.452489  | -0.554624 |
| 13            | 6             | 0           | -0.541516               | 2.380488  | -0.567021 |
| 14            | 16            | 0           | -1.140889               | 3.031605  | 0.861076  |
| 15            | 6             | 0           | -1.202040               | 2.649798  | -1.779497 |
| 16            | 1             | 0           | -0.921294               | -0.032299 | 2.007609  |
| 17            | 8             | 0           | 2.335260                | -0.001067 | 1.453694  |
| 18            | 1             | 0           | -1.061148               | 1.512166  | 5.209525  |
| 19            | 1             | 0           | -1.588155               | 0.153528  | 4.198283  |
| 20            | 1             | 0           | -0.864814               | 1.595070  | 3.446941  |
| 21            | 1             | 0           | 2.869896                | -0.377071 | 6.292664  |
| 22            | 1             | 0           | 4.291659                | -1.153254 | 4.507132  |
| 23            | 1             | 0           | 4.195229                | 0.008546  | 3.158124  |
| 24            | 1             | 0           | 3.531758                | -1.604539 | 2.964727  |
| 25            | 1             | 0           | 0.129677                | 3.023030  | 1.753147  |
| 26            | 1             | 0           | -2.128199               | 0.209210  | -0.284753 |
| 27            | 1             | 0           | -1.519390               | -1.434927 | -0.395035 |
| 28            | 1             | 0           | -1.258069               | -0.316638 | -1.725866 |
| 29            | 1             | 0           | 1.329052                | 1.688618  | 0.198236  |

|    |    |   |           |           |           |
|----|----|---|-----------|-----------|-----------|
| 30 | 17 | 0 | 1.424358  | 3.210361  | 2.742528  |
| 31 | 6  | 0 | -0.670739 | 2.237731  | -2.960464 |
| 32 | 1  | 0 | -1.179262 | 2.485869  | -3.880115 |
| 33 | 6  | 0 | 1.215449  | 1.200720  | -1.860907 |
| 34 | 6  | 0 | 0.558377  | 1.535757  | -3.044628 |
| 35 | 1  | 0 | -2.100332 | 3.243432  | -1.761800 |
| 36 | 6  | 0 | 2.438696  | 0.554370  | -1.891913 |
| 37 | 1  | 0 | 2.900127  | 0.306035  | -0.949241 |
| 38 | 6  | 0 | 1.155055  | 1.205034  | -4.269210 |
| 39 | 1  | 0 | 0.652102  | 1.461205  | -5.188231 |
| 40 | 6  | 0 | 2.360439  | 0.571598  | -4.304581 |
| 41 | 1  | 0 | 2.838456  | 0.312411  | -5.233692 |
| 42 | 6  | 0 | 3.014479  | 0.246117  | -3.109475 |
| 43 | 1  | 0 | 0.804529  | -0.647745 | -0.340224 |
| 44 | 8  | 0 | 4.193143  | -0.361330 | -3.245962 |
| 45 | 6  | 0 | 4.898782  | -0.706890 | -2.079523 |
| 46 | 1  | 0 | 4.328676  | -1.402078 | -1.468055 |
| 47 | 1  | 0 | 5.812035  | -1.180335 | -2.411906 |
| 48 | 1  | 0 | 5.138053  | 0.176141  | -1.492250 |

---
